# Supplementary material for: Metal-mediated reactions between dialkylcyanamides and acetamidoxime generate unusual (nitrosoguanidinate)nickel(ii) complexes
Source: Royal Society of Chemistry journal article supplement (doi:10.1039/c7dt01960b), 2017-01-01
Supplement: c7dt01960b1.pdf [file c7dt01960b1.pdf]

## **SUPPORTING INFORMATION**

### **Metal-mediated Reactions between Dialkylcyanamides and Acetamidoxime Generate Unusual (Nitrosoguanidinate)Nickel(II) Complexes**

Zarina M. Bikbaeva, Alexander S. Novikov, Vitalii V. Suslonov, Nadezhda A. Bokach\*  
and Vadim Yu. Kukushkin\*

Saint Petersburg State University, 7/9 Universitetskaya Nab., 199034 Saint Petersburg,  
Russian Federation

## Table of Contents

|                                                                                                                                                |    |
|------------------------------------------------------------------------------------------------------------------------------------------------|----|
| Solid-state structures of the nitrosoguanidinate complexes <b>1–3</b> and <b>5</b> .....                                                       | 3  |
| Theoretical discussions on the nature of the singlet excited electronic states of <b>1</b> and assignment of most significant transitions..... | 4  |
| Spectra of compounds <b>1–7</b> .....                                                                                                          | 6  |
| Molecular structure of $[\text{Ni}\{\text{NH}=\text{C}(\text{NH}_2)\text{NN}(\text{O})\}_2]$ , <b>1</b> , and <b>3–5</b> .....                 | 33 |
| Crystal data and structure refinement for <b>1</b> and <b>3–5</b> .....                                                                        | 36 |
| Cartesian atomic coordinates of model structures .....                                                                                         | 38 |

## Solid-state structures of nitrosoguanidinate complexes 1–3 and 5

The bond angles for compounds 1–3 and 5 are in the ranges 80.97(5)–81.56° for N(2)–Ni(1)–N(1) and 98.54(12)–99.03(5)° for N(1')–Ni(1)–N(2). The Ni(1)–N(1) and Ni(1)–N(2) bond lengths are within the 1.869(3)–1.877(2) Å, 1.841(3)–1.857(3) Å intervals, and these distances are comparable to those in complexes with the Ni–N(H)=C linkages (the Ni–N bond lengths is 1.822(3)–1.885(2) Å for bis{N-[1-(2-pyrrolyl)ethylidene]aminato}nickel(II);<sup>1</sup> [Ni<sup>II</sup>(<sup>2</sup>L<sup>ISQ</sup>)<sub>2</sub>], L<sup>ISQ</sup> = *N,N*-coordinated *o*-diiminobenzosemiquinonate(1–) radical;<sup>2</sup> [Ni(C<sub>2</sub>H<sub>5</sub>N<sub>4</sub>S)<sub>2</sub>];<sup>3</sup> Ni(Hapt)<sub>2</sub>, apt = 4-amino-3-pyridinethiolate;<sup>4</sup> [Ni(C<sub>4</sub>H<sub>11</sub>N<sub>5</sub>)<sub>2</sub>](Cl)(OH);<sup>5</sup> [Ni(C<sub>4</sub>H<sub>2</sub>N<sub>4</sub>)<sub>2</sub>].<sup>6</sup> The C(1)–N(3) bond length (1.391(2)–1.411(5) Å) is slightly longer than typical single C<sub>sp2</sub>–N(2) bond (1.376(11) Å in imidazole,<sup>7</sup> indicating its single bond character. The C(1)–N(2) distances are 1.297(11)–1.319(4) Å, which is close to those distance for double C<sub>sp2</sub>=N(2) bond (1.313(11) Å in imidazole.<sup>7</sup> The C(1)–N(4) bond lengths (1.331(3)–1.347(4) Å) lie in the range typical for similar C<sub>sp2</sub>–N<sub>sp2</sub> bonds (1.325(9) Å in amides, 1.334(8) and 1.347(10) Å in ureas),<sup>7</sup> involved into conjugation.

---

<sup>1</sup> Birdsall, W. J., *Polyhedron* **1994**, *13*, 2055–2060.

<sup>2</sup> D. Herebian, E. B., F. Neese *J. Am. Chem. Soc.* **2003**, *125*, 9116–9128.

<sup>3</sup> Kabir, M. K.; Yamada, K.; Adachi, K.; Kondo, M.; Kawata, S., *cis*-Bis(amidinothioureato-[kappa]2N,N')nickel(II). *Acta Crystallographica Section E* **2002**, *58* (10), m580-m582.

<sup>4</sup> K. Matsumoto; M. Nishizawa; Hirao, Y., *Hererocycl.* **2014**, *88* (1).

<sup>5</sup> Lemoine, P., *Acta Cryst.* **1996**, *C52*, 1430–1436.

<sup>6</sup> Peng, S., *Acta Cryst.* **1984**, *C40*, 1541–1542.

<sup>7</sup> Allen, F. H.; Kennard, O.; Watson, D. G.; Brammer, L.; Orpen, A. G.; Taylor, R., Tables of bond lengths determined by X-ray and neutron diffraction. Part 1. Bond lengths in organic compounds. *Journal of the Chemical Society, Perkin Transactions 2* **1987**, (12), S1-S19.

## Theoretical discussions on the nature of the singlet excited electronic states of **1** and assignment of most significant transitions

To determine the nature of singlet excited electronic states of **1** and to assist in the assignment of significant transitions, theoretical TD-DFT calculations (CAM-B3LYP/6-311++G\*\* level of theory) were carried out based on the equilibrium geometry of **1** in a dichloromethane solution. Theoretically calculated transition energies to the low-lying singlet excited electronic states of **1**, absorption wavelengths, oscillator strengths  $f$  and main contributing transitions are presented in **Table S1** and the corresponding theoretical UV-Vis absorption spectra is given in **Figure S1**.

**Table S1.** Theoretically calculated transition energies (in eV) to the low-lying singlet excited electronic states of **1**, absorption wavelengths (in nm), oscillator strengths  $f$  (only for  $f \geq 0.10$ ), and main contributing transitions (CAM-B3LYP/6-311++G\*\* level of theory).

| State* | Transition energy | Wavelength | $f$  | Main contributing transition      |
|--------|-------------------|------------|------|-----------------------------------|
| S7     | 3.59              | 345        | 0.10 | HOMO $\rightarrow$ LUMO (88%)     |
| S10    | 4.58              | 271        | 0.61 | HOMO-4 $\rightarrow$ LUMO (24%)   |
| S12    | 4.88              | 254        | 0.41 | HOMO-1 $\rightarrow$ LUMO+2 (44%) |
| S20    | 5.48              | 226        | 0.69 | HOMO-1 $\rightarrow$ LUMO+2 (46%) |
| S21    | 5.55              | 223        | 0.13 | HOMO-8 $\rightarrow$ LUMO (36%)   |

\* The excited states are labeled according to their vertical transition energies.

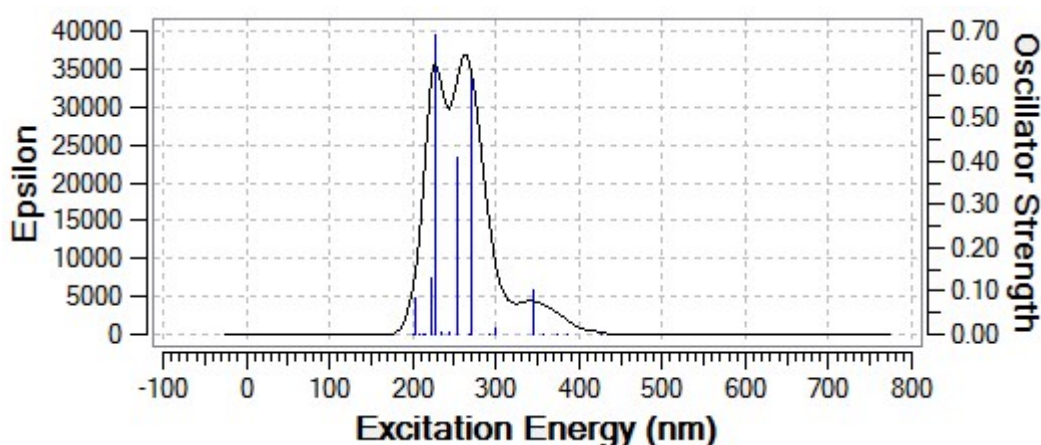

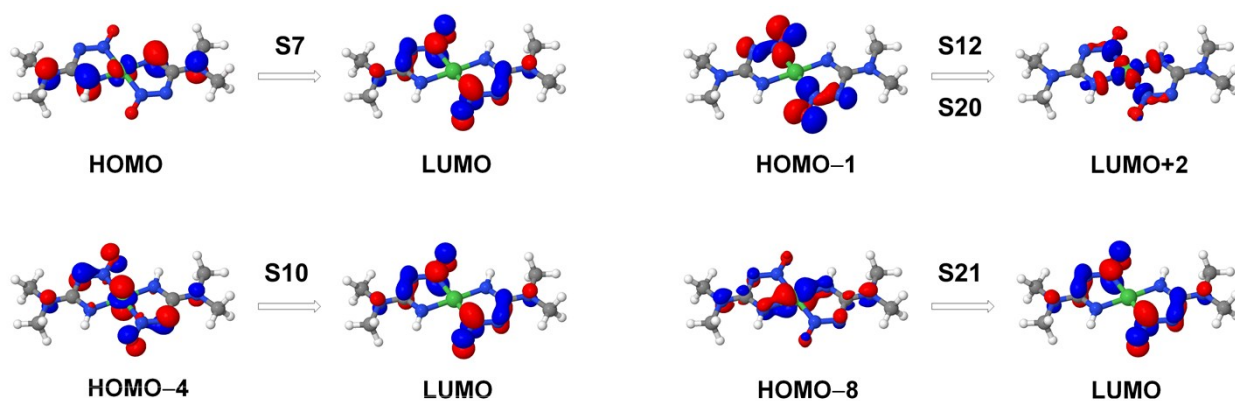

**Figure S1.** Theoretical UV-Vis absorption spectra of **1** and main contributing transitions of the bands.

For **1**, the electron density of the HOMO mainly includes contributions from the Ni center and N atoms of the NH and NMe<sub>2</sub> fragments, whereas the LUMO is located on the O=N–N–C–NMe<sub>2</sub> moieties. The theoretical absorption spectra of **1** determined by both metal-to-ligand charge transfer (<sup>1</sup>MLCT) and intraligand charge transfer (<sup>1</sup>LLCT) processes and characterized by three peaks with maxima centered at 226 (S20), 271 (S10), and 345 (S7) nm. The bands at 226 and 271 nm are by 6–7 times more intense than that at 345 nm. The overall shape of the theoretical spectra agrees well with the experimental one.

## Spectra of 1-7

[Ni{NH=C(NMe<sub>2</sub>)NN(O)}<sub>2</sub>] (1, ZBM7)

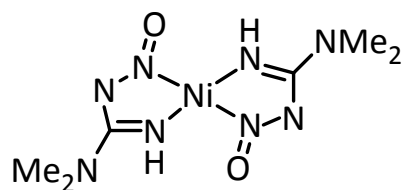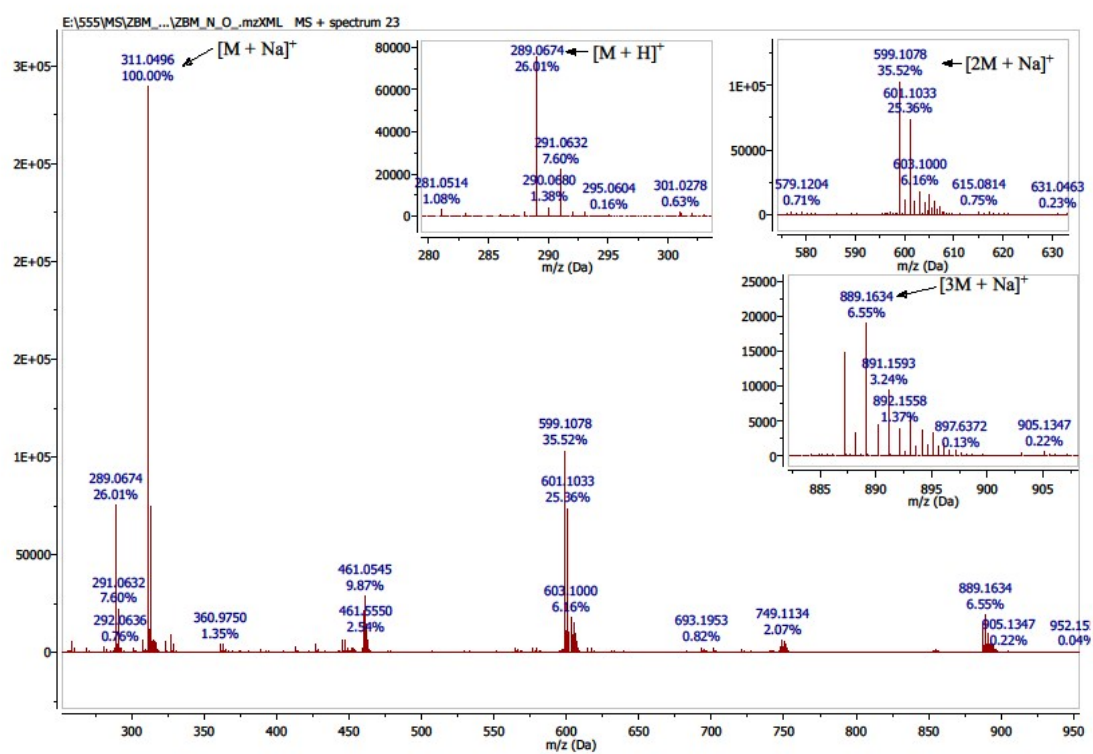

Figure S2. HRESI-MS of 1.

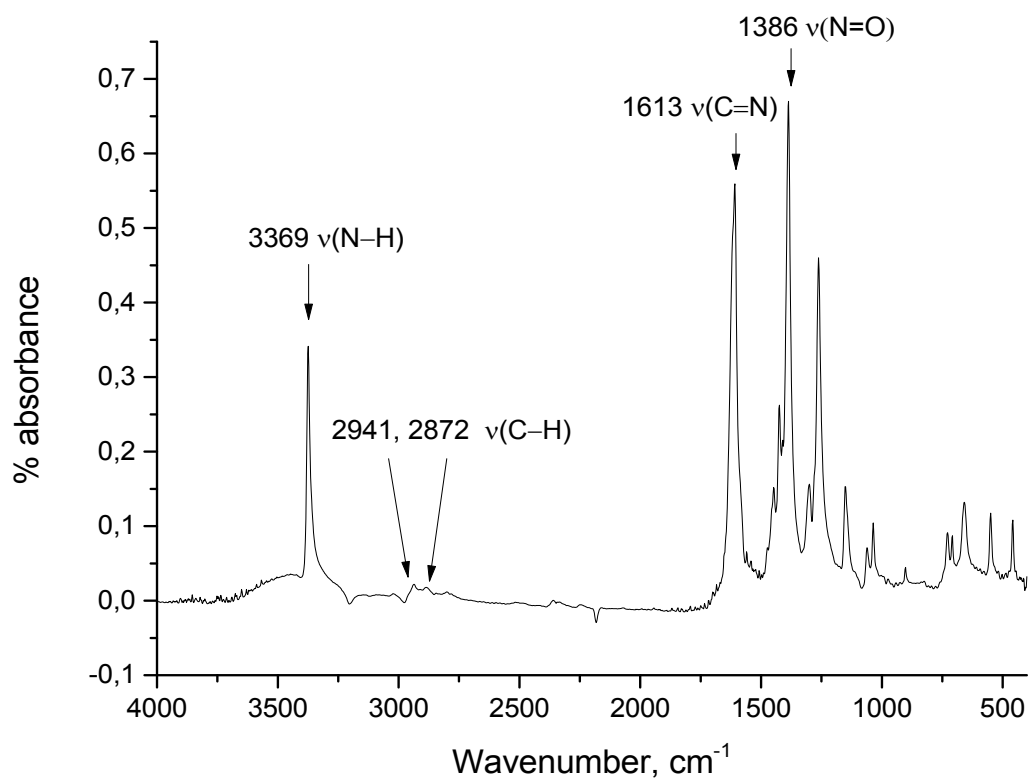

**Figure S3.** The FTIR spectrum of **1**.

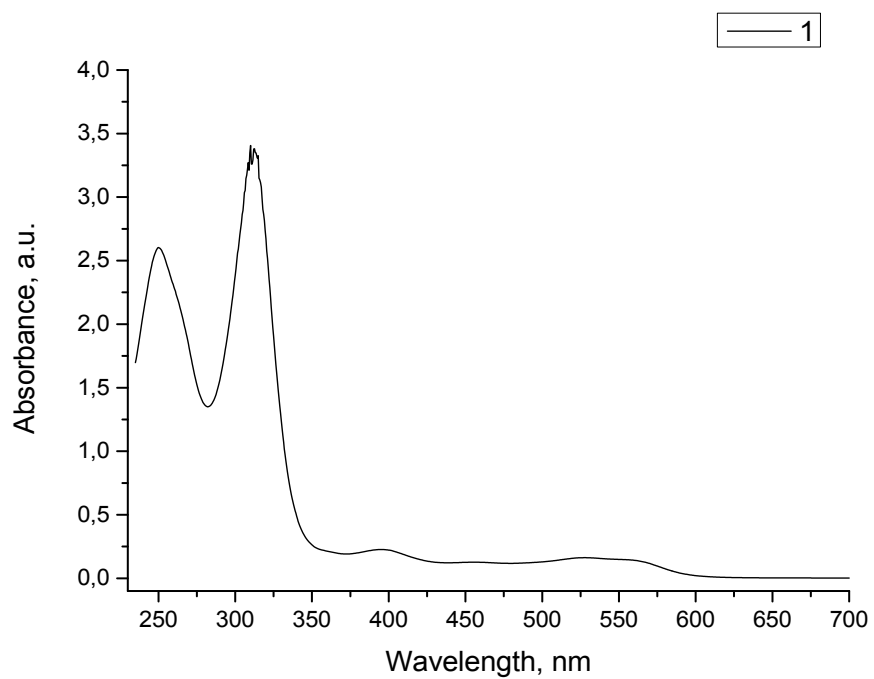

**Figure S4.** The UV-vis absorption spectrum of **1** in dichloromethane.

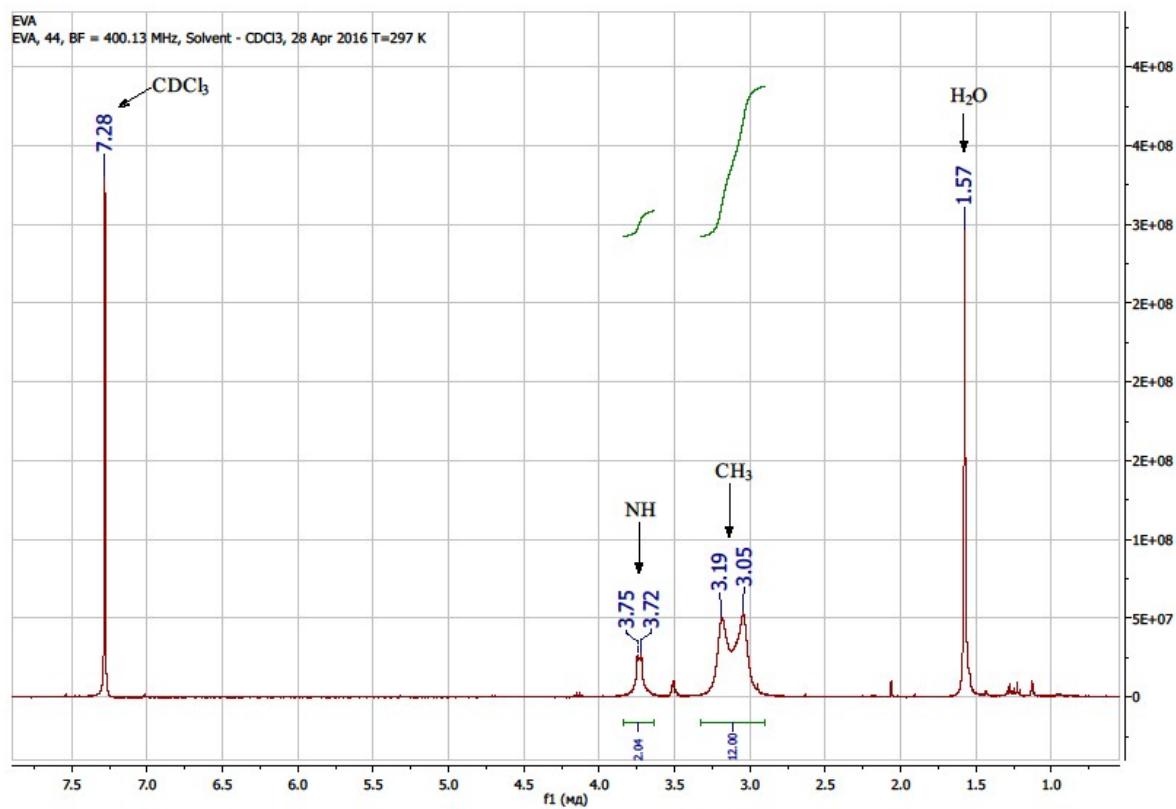

Figure S5. The <sup>1</sup>H NMR spectrum of 1.

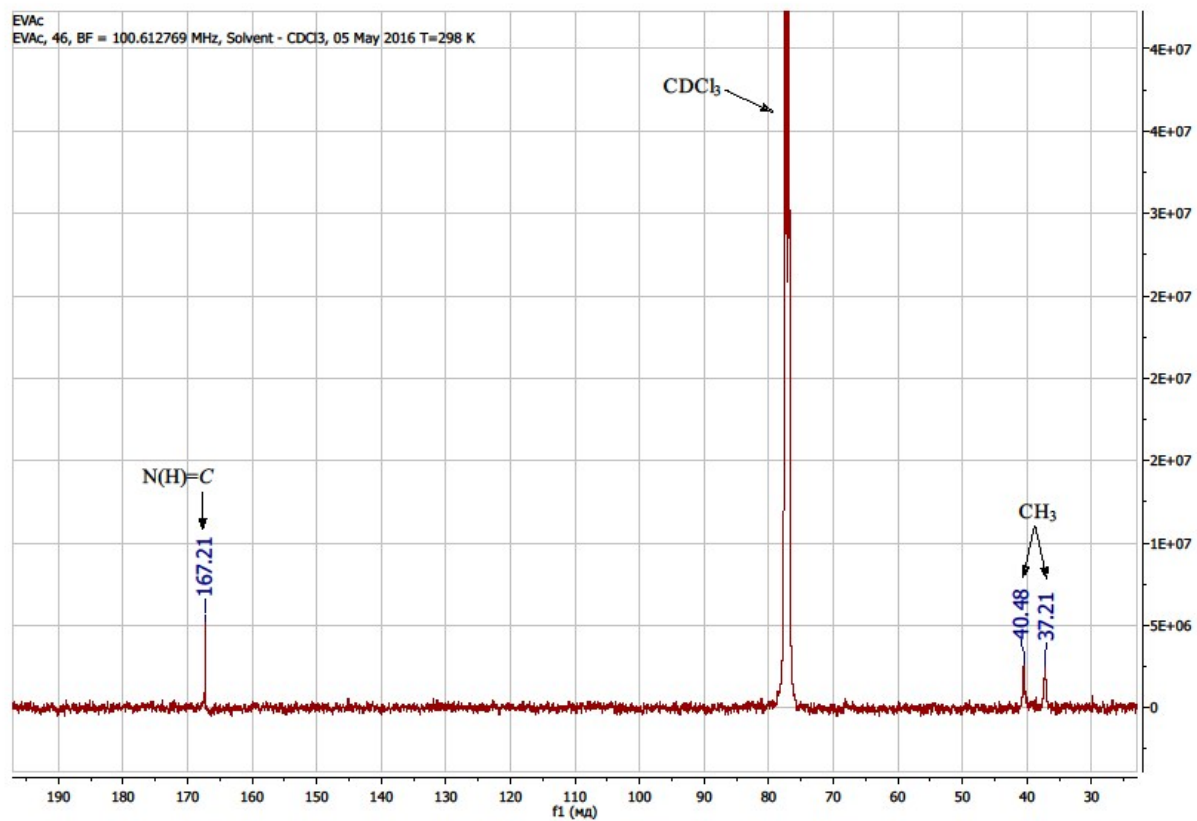

Figure S6. The <sup>13</sup>C{<sup>1</sup>H} NMR spectrum of 1.



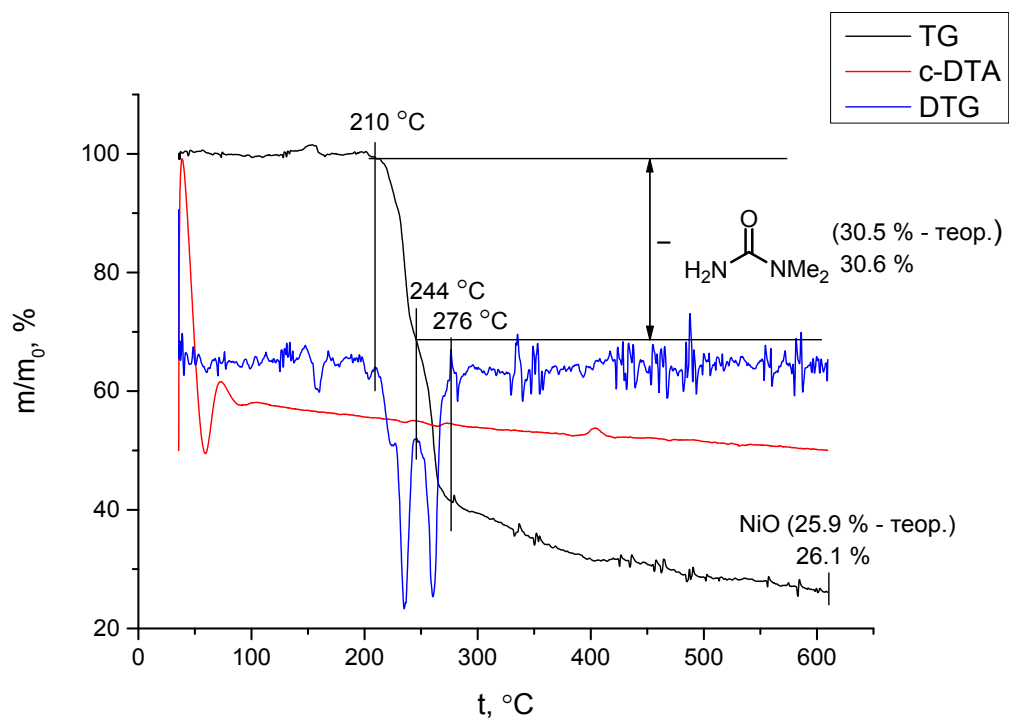

**Figure S7.** TG, dTG and c-DTA curves for **1**.

[Ni{NH=C(N(CH<sub>2</sub>)<sub>4</sub>O)NN(O)}<sub>2</sub>] (2, ZBM28)

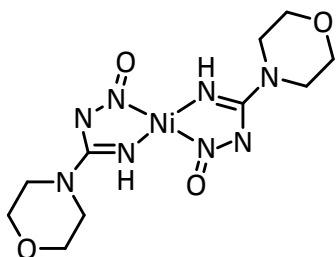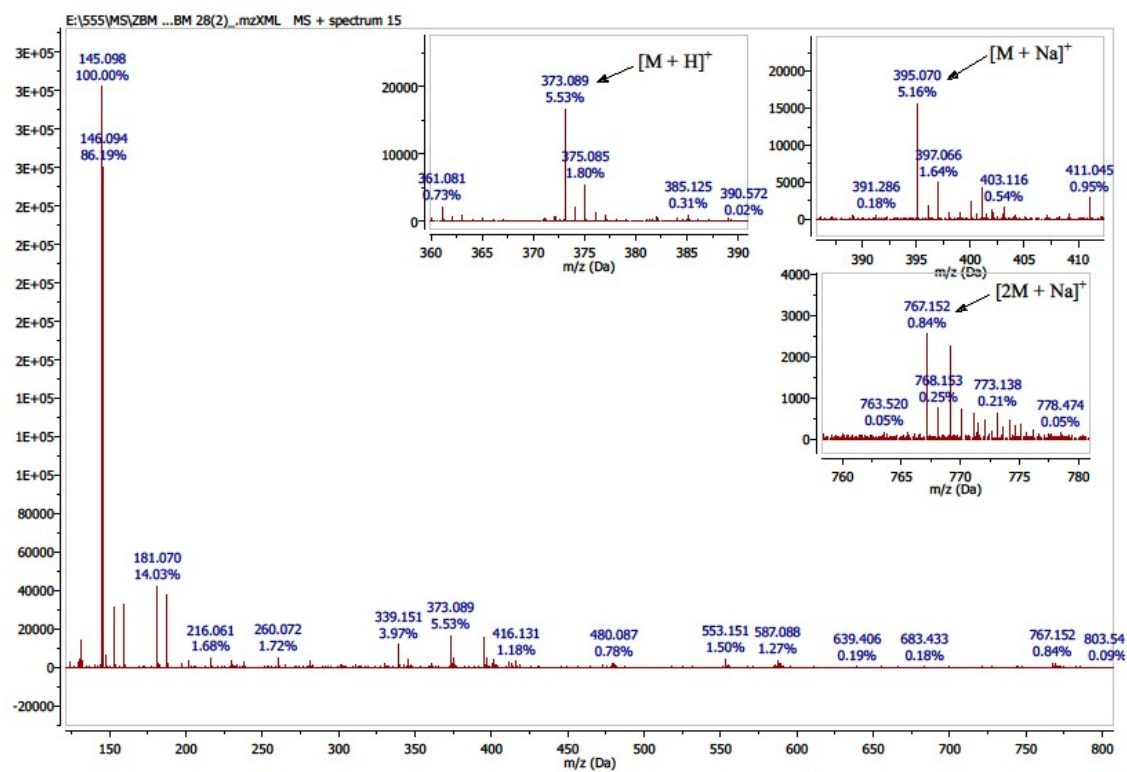

Figure S8. HRESI-MS of 2.

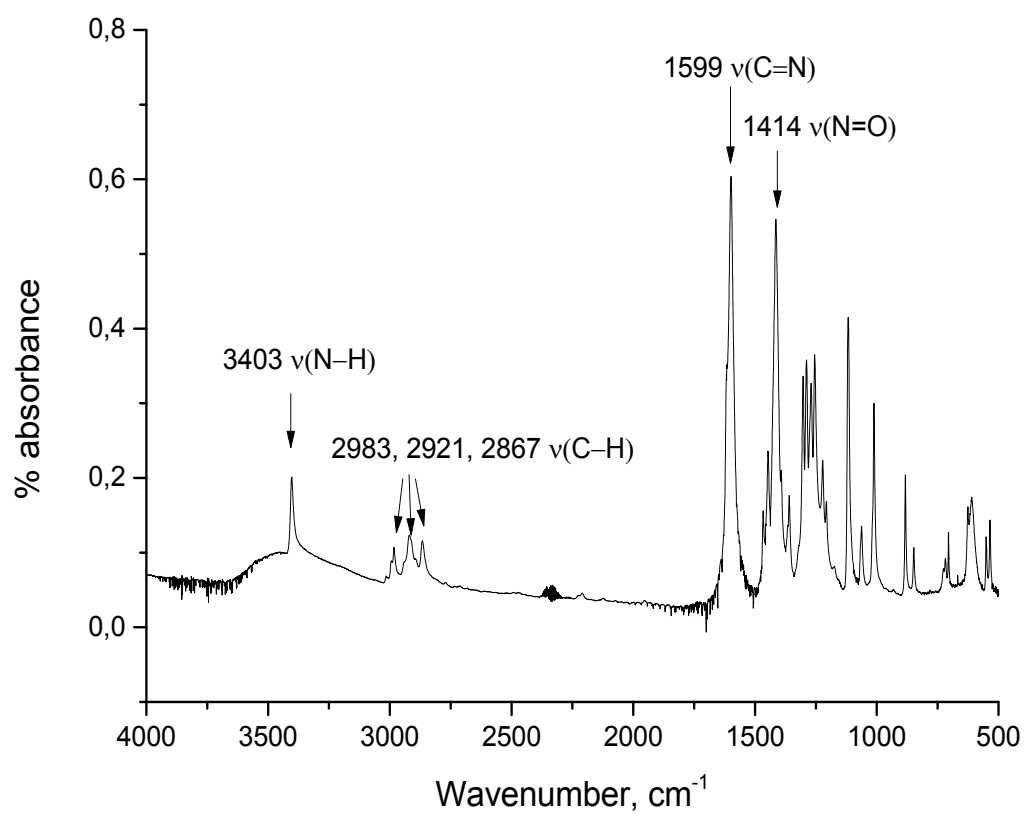

**Figure S9.** The FTIR spectrum of **2**.

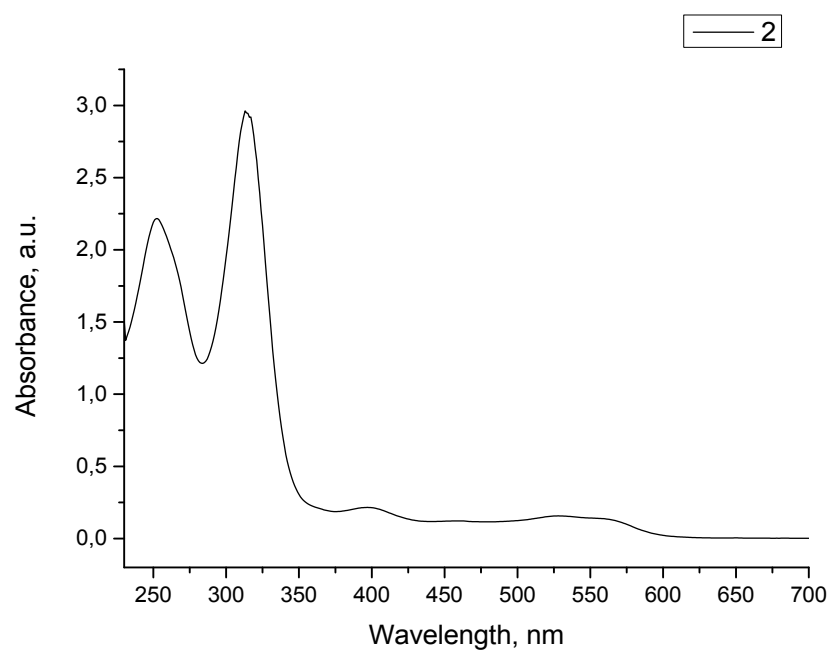

**Figure S10.** The UV-vis absorption spectrum of **1** in dichloromethane.

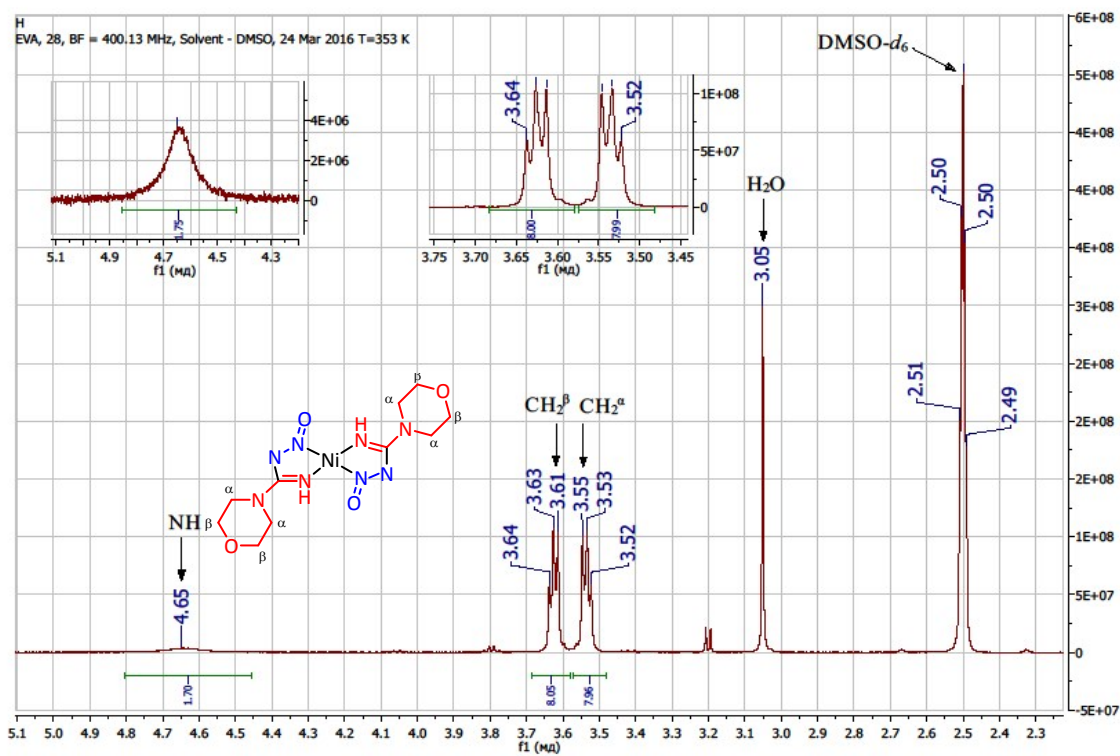

Figure S11. The <sup>1</sup>H NMR spectrum of 2.

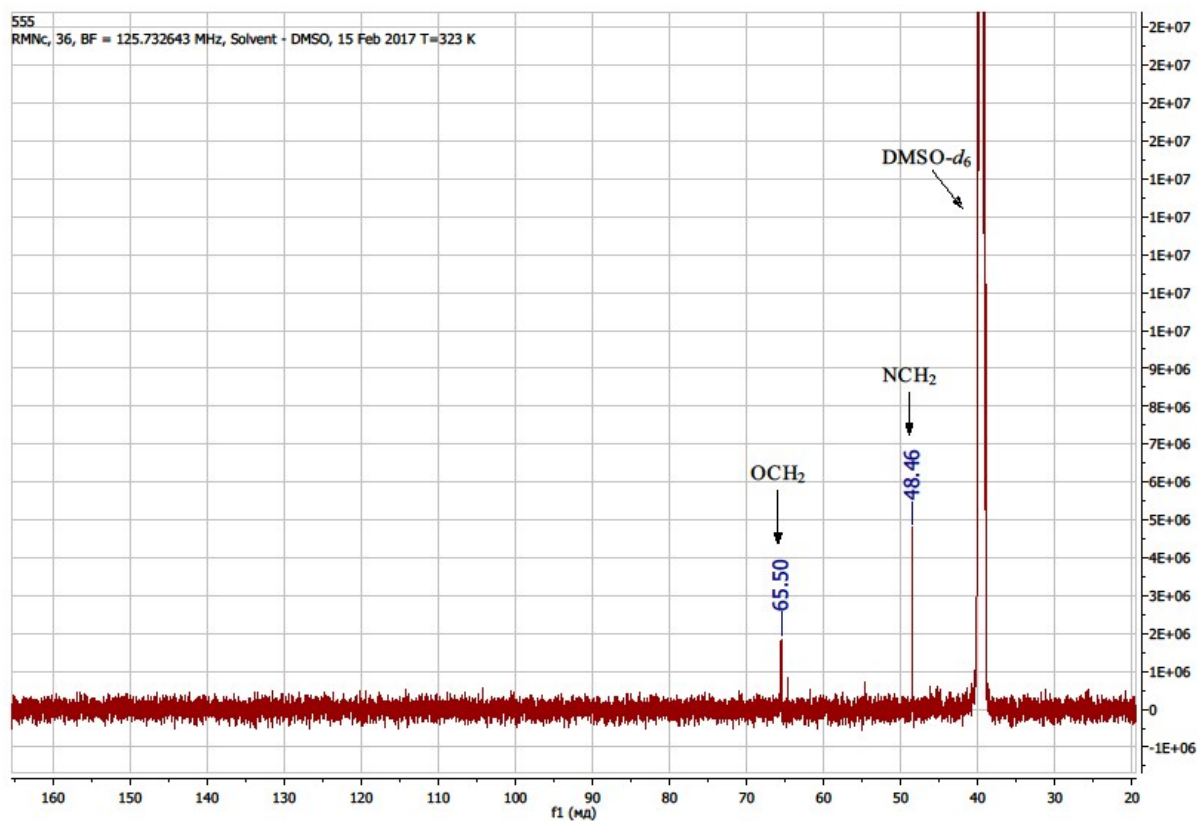

Figure S12. The <sup>13</sup>C{<sup>1</sup>H} NMR spectrum of 2.

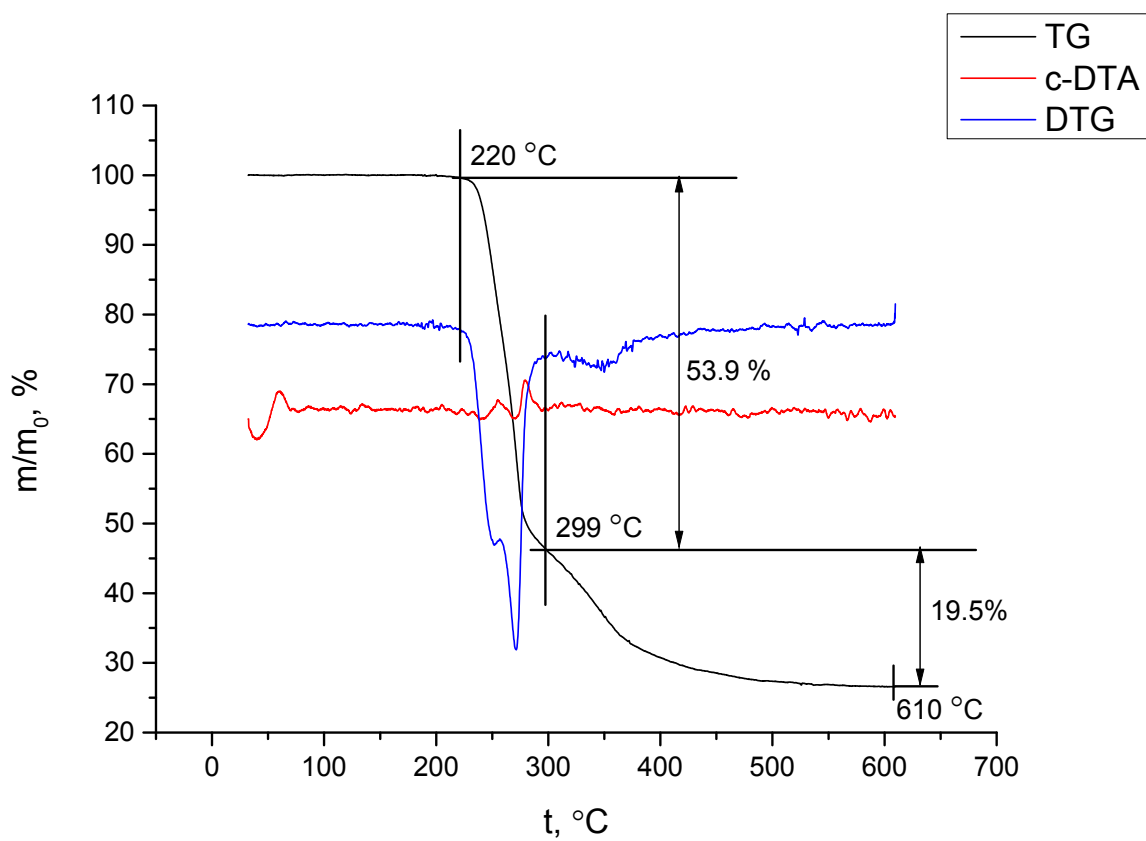

**Figure S13.** TG, dTG and c-DTA curves for **2**.

$[\text{Ni}\{\text{NH}=\text{C}(\text{N}(\text{CH}_2)_5\text{NN}(\text{O})\}_2]_2$  (**3**, ZBM41)

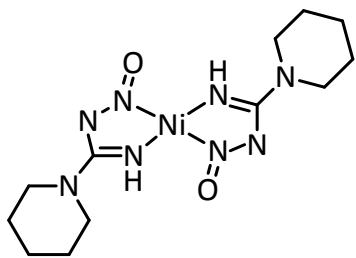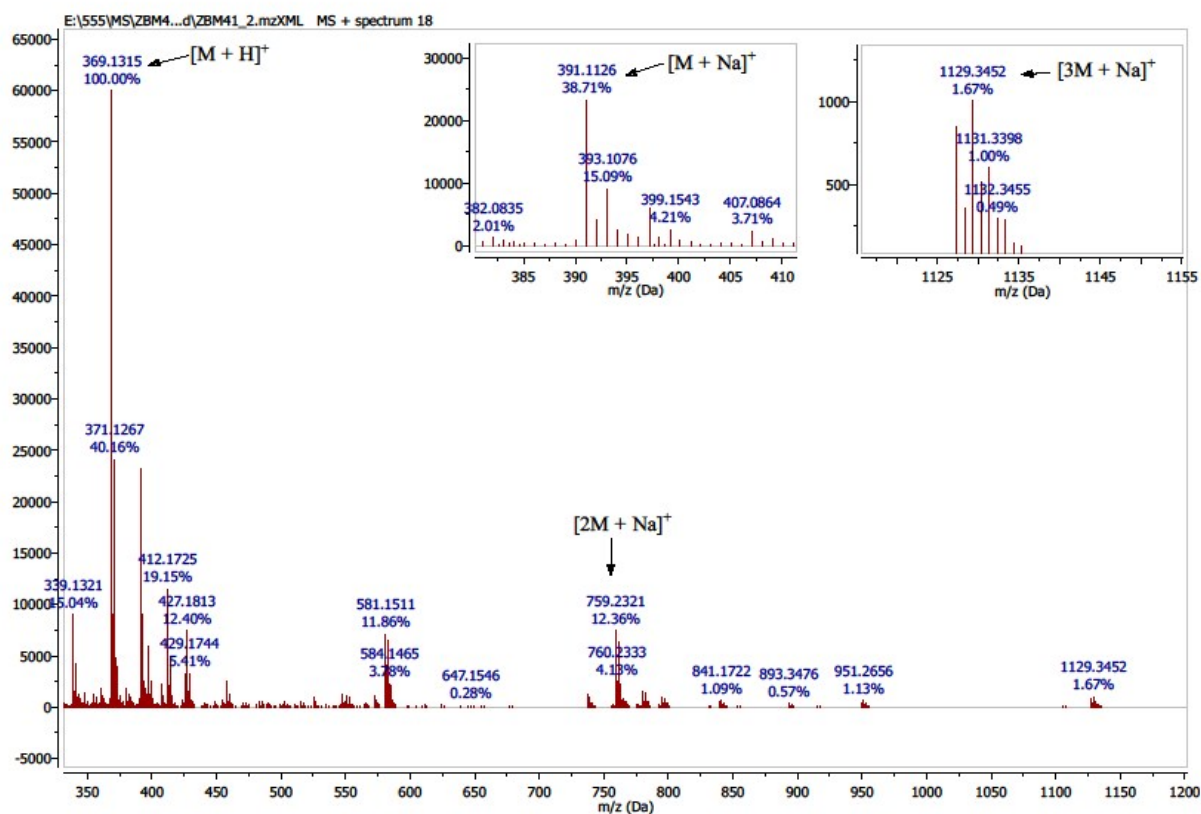

Figure S14. HRESI-MS of **3**.

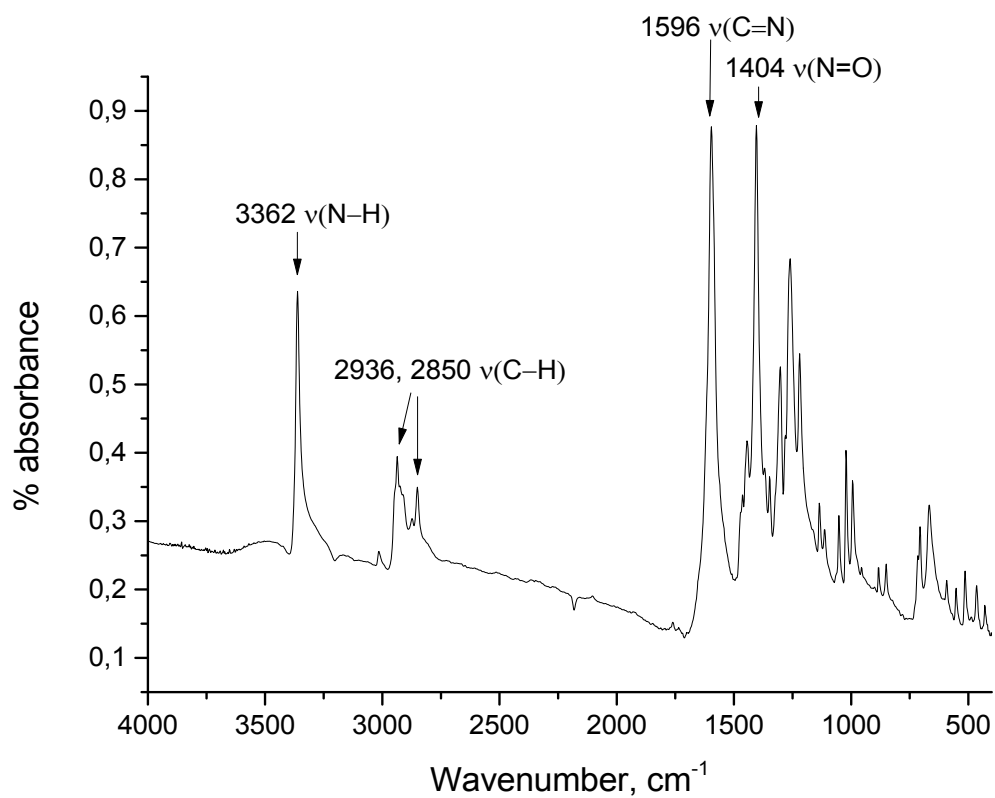

**Figure S15.** The FTIR spectrum of **3**.

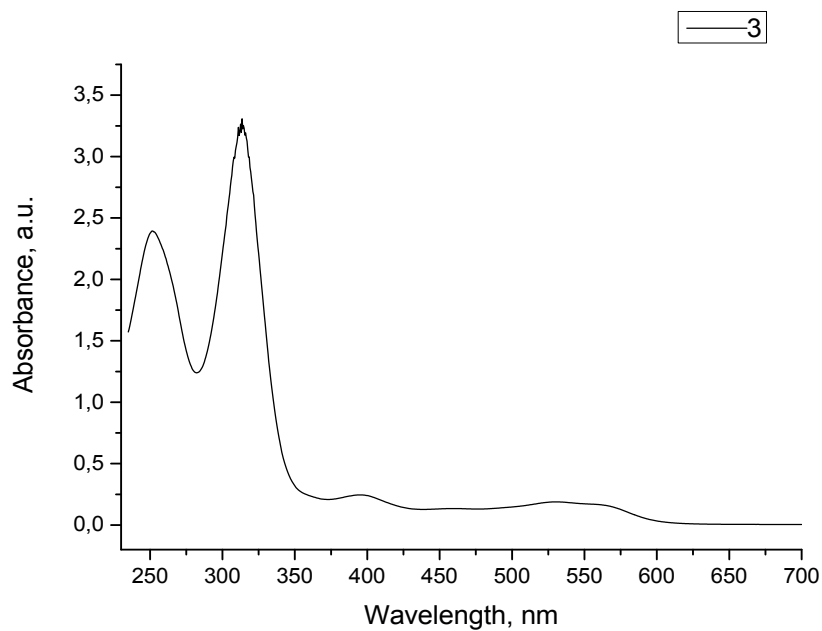

**Figure S16.** The UV-vis absorption spectrum of **3** in dichloromethane.

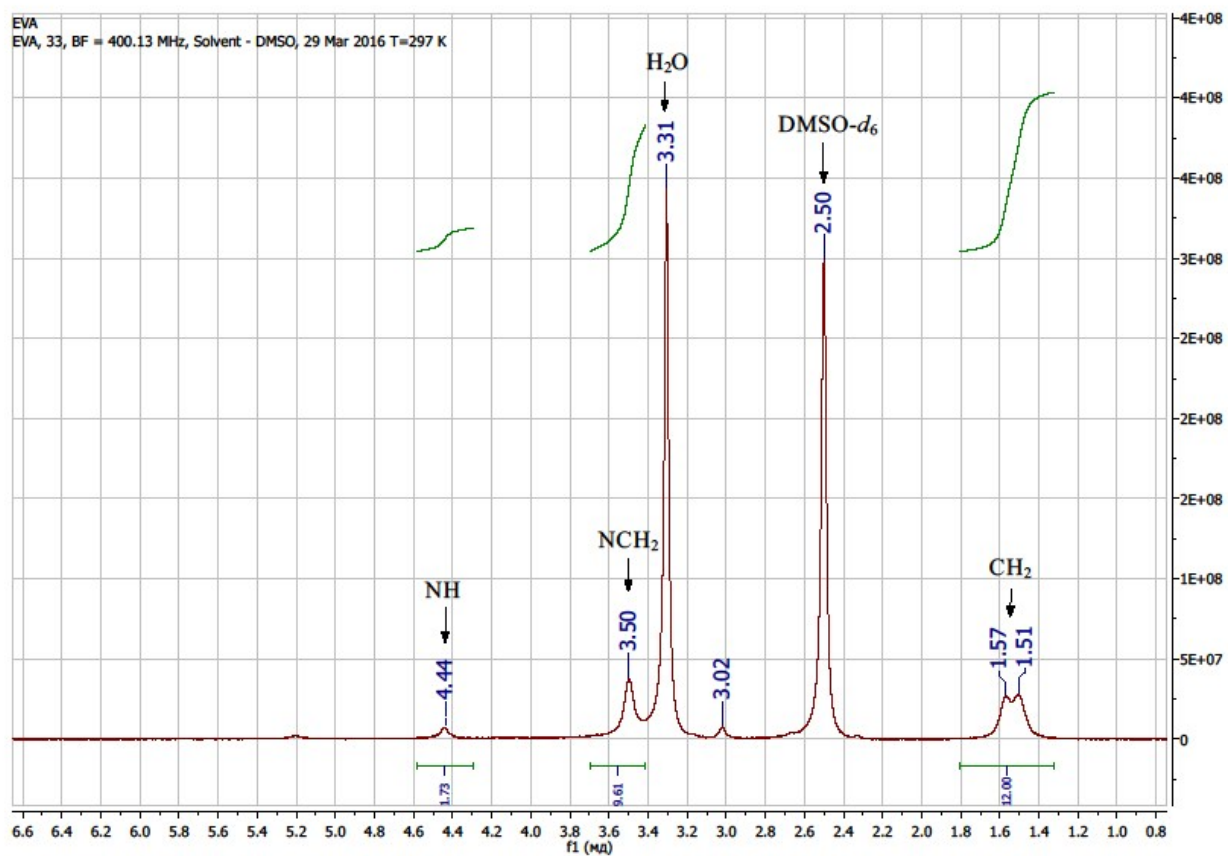

Figure S17. The  $^1\text{H}$  NMR spectrum of 3.

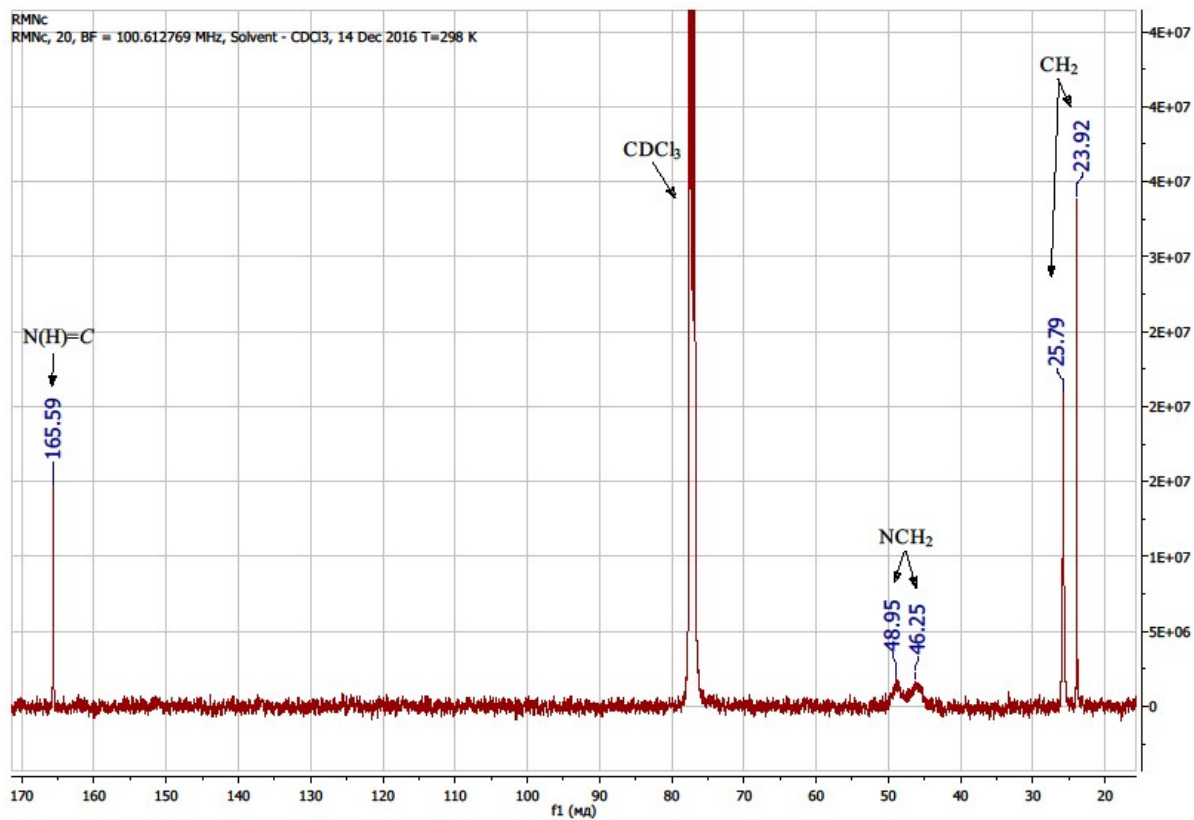

Figure S18. The  $^{13}\text{C}\{^1\text{H}\}$  NMR spectrum of 3.



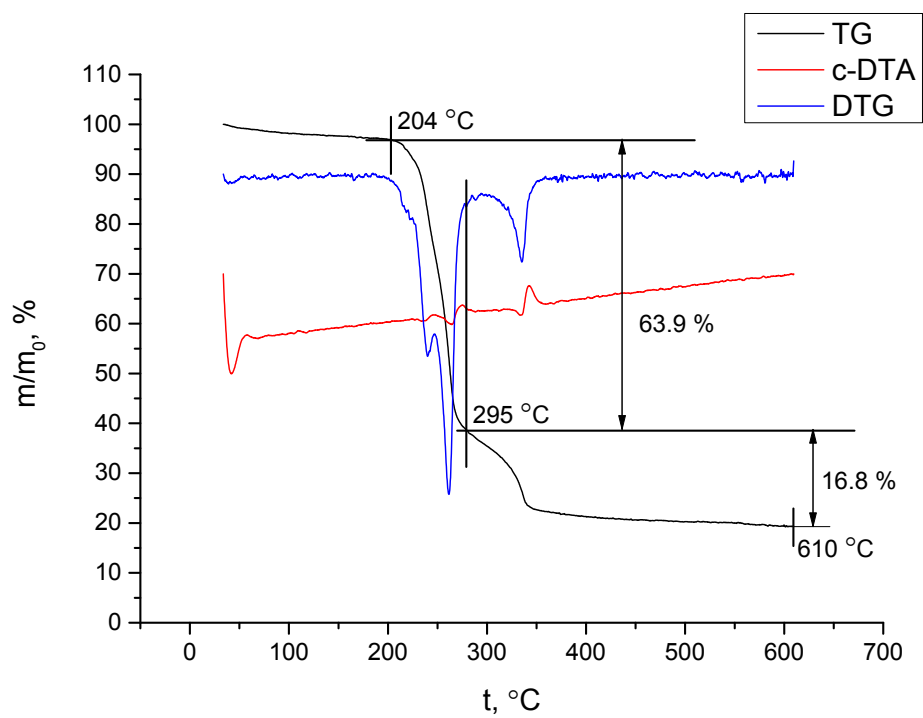

**Figure S19.** TG, dTG and c-DTA curves for **3**.

[Ni{NH=C(N(CH<sub>2</sub>)<sub>4</sub>)NN(O)}<sub>2</sub>] (4, ZBM63)

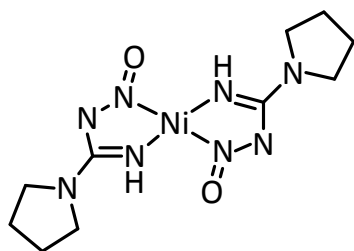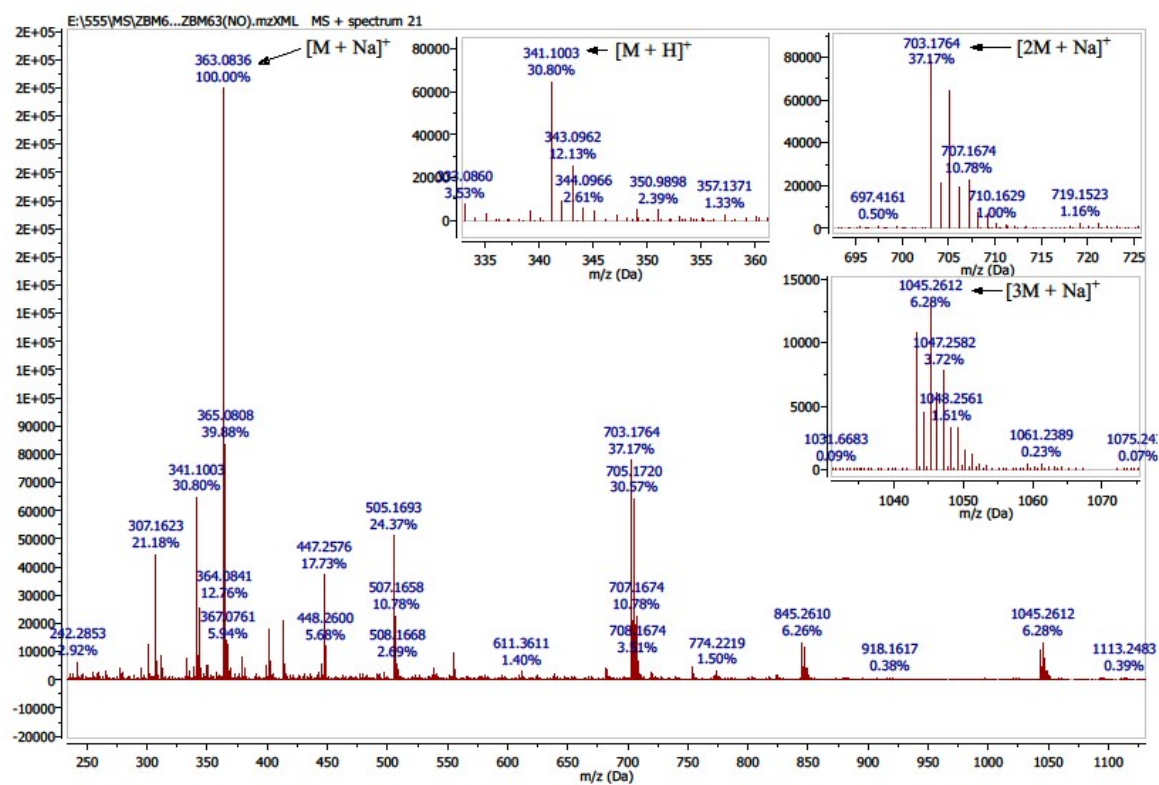

Figure S20. HRESI-MS of 4.

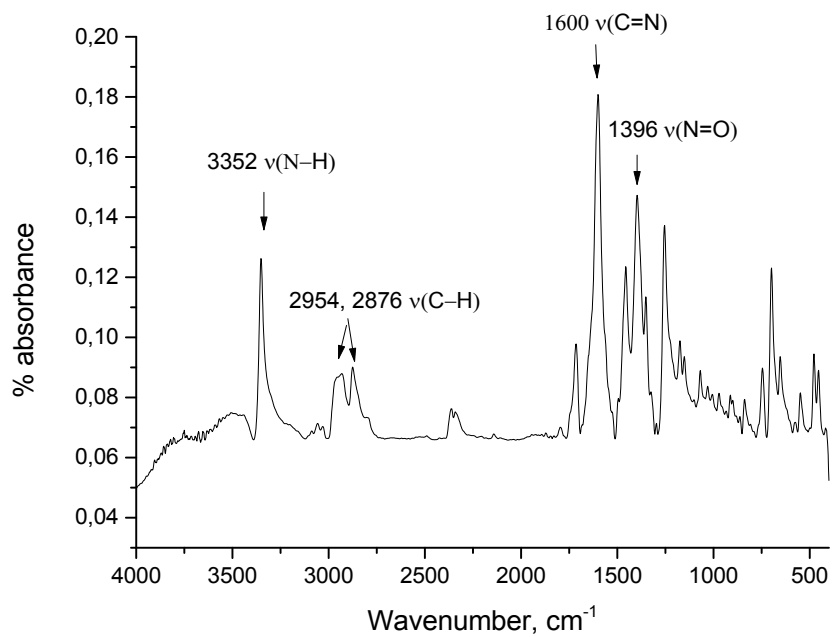

**Figure S21.** The FTIR spectrum of **4**.

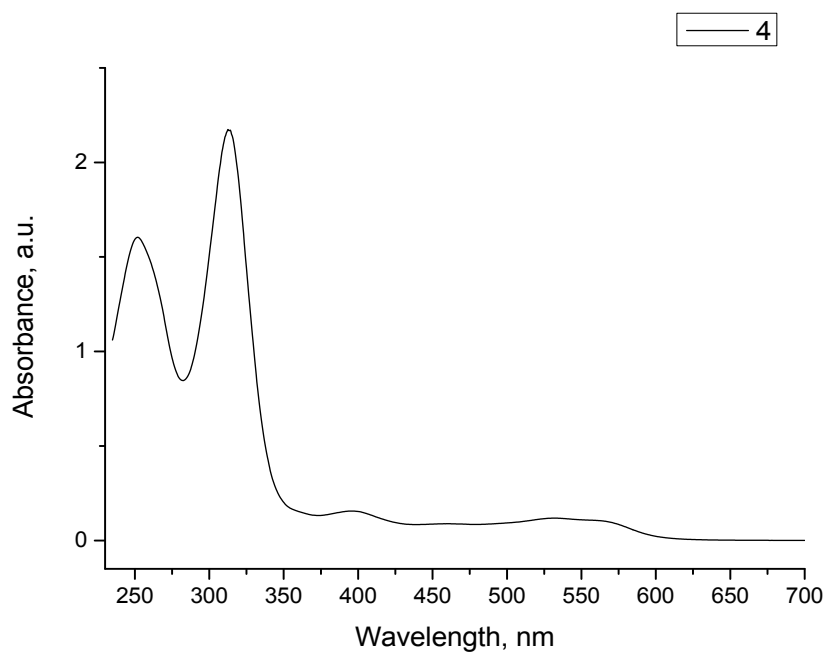

**Figure S22.** The UV-vis absorption spectrum of **4** in dichloromethane.

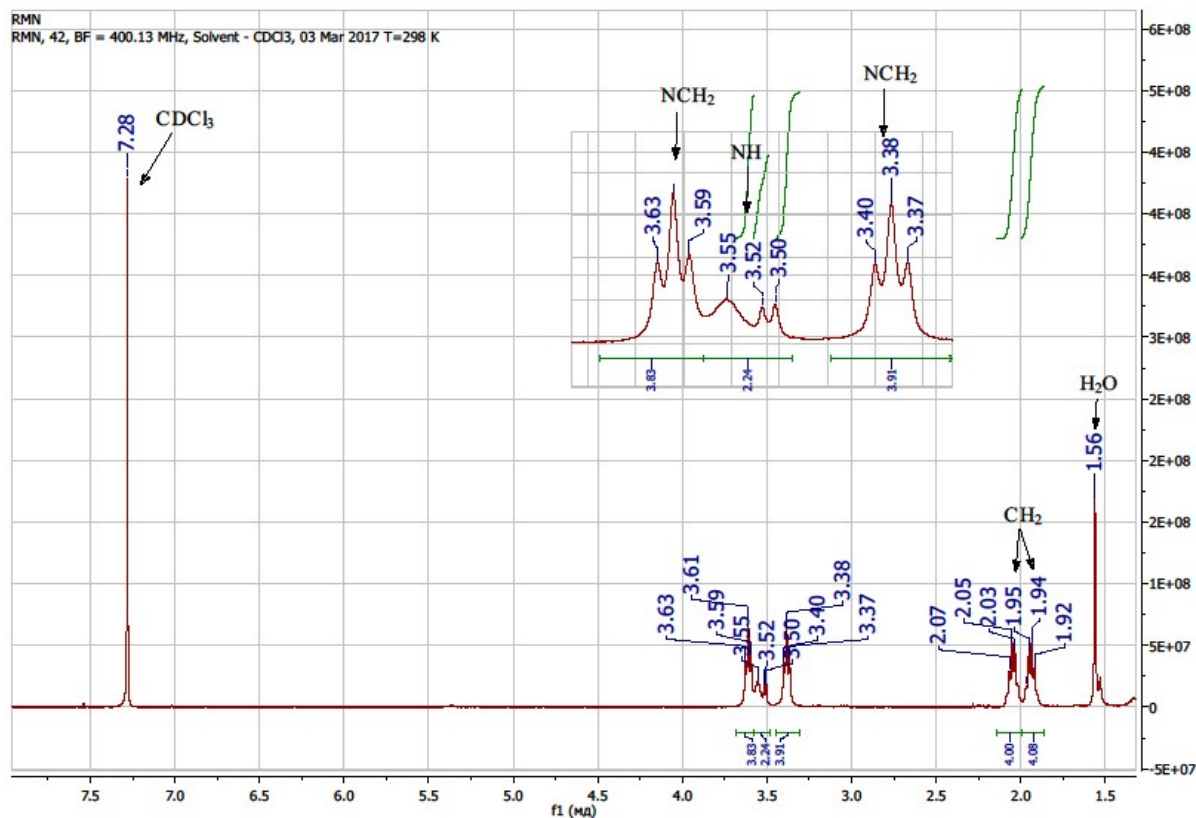

Figure S23. The <sup>1</sup>H NMR spectrum of 4.

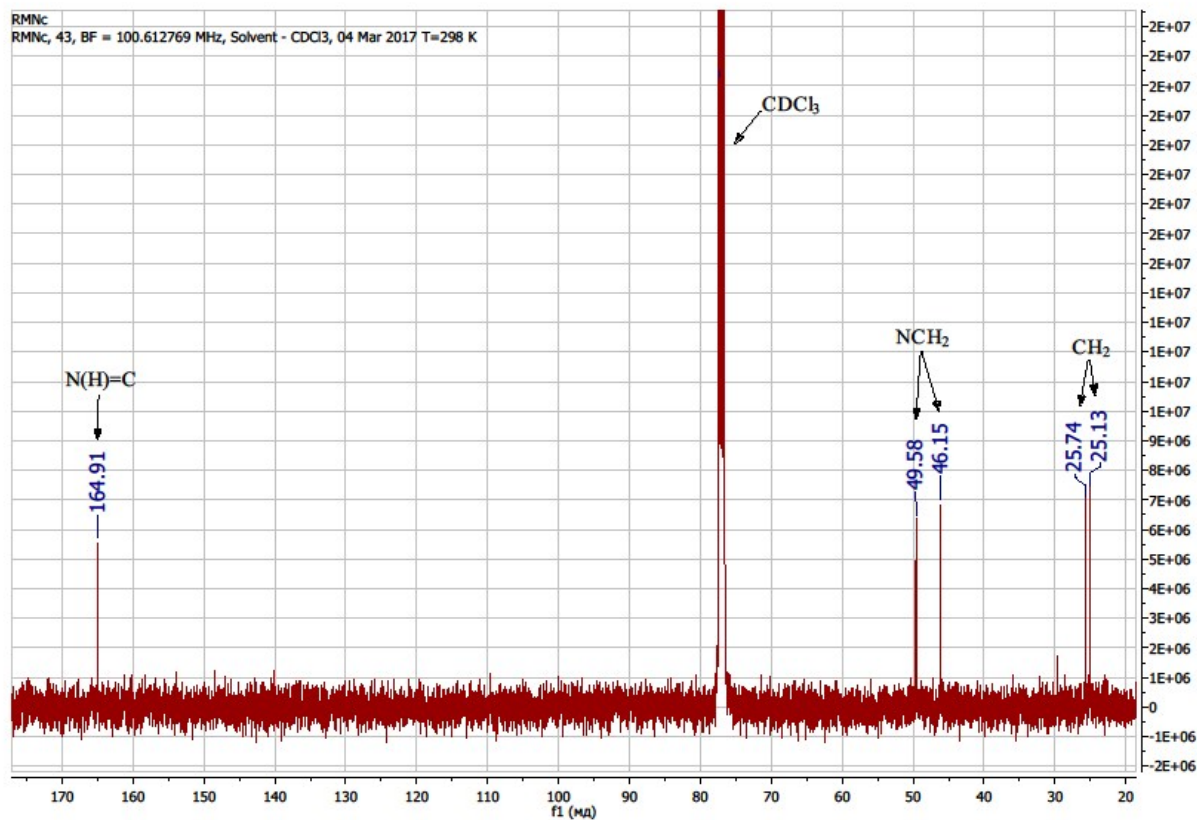

Figure S24. The <sup>13</sup>C{<sup>1</sup>H} NMR spectrum of 4.

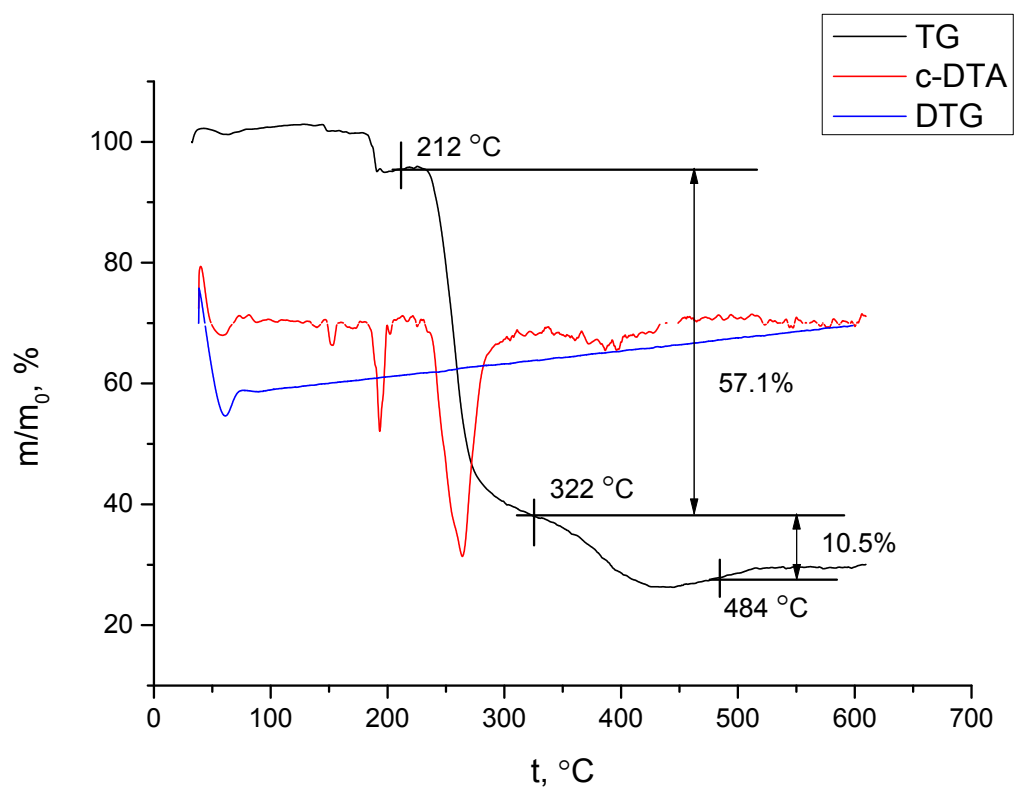

**Figure S25.** TG, dTG and c-DTA curves for **4**.

[Ni{NH=C(N(CH<sub>3</sub>)Ph)NN(O)}<sub>2</sub>] (**5**, ZBM70)

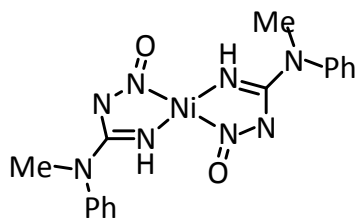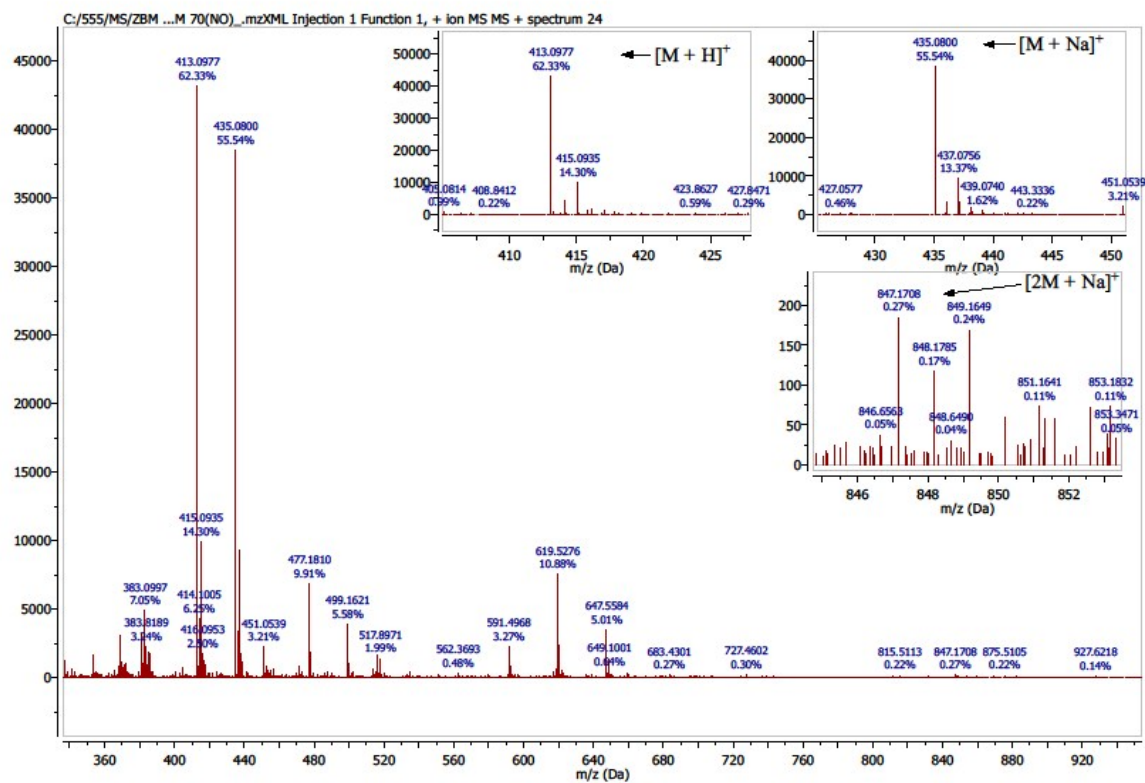

Figure S26. HRESI-MS of **5**.

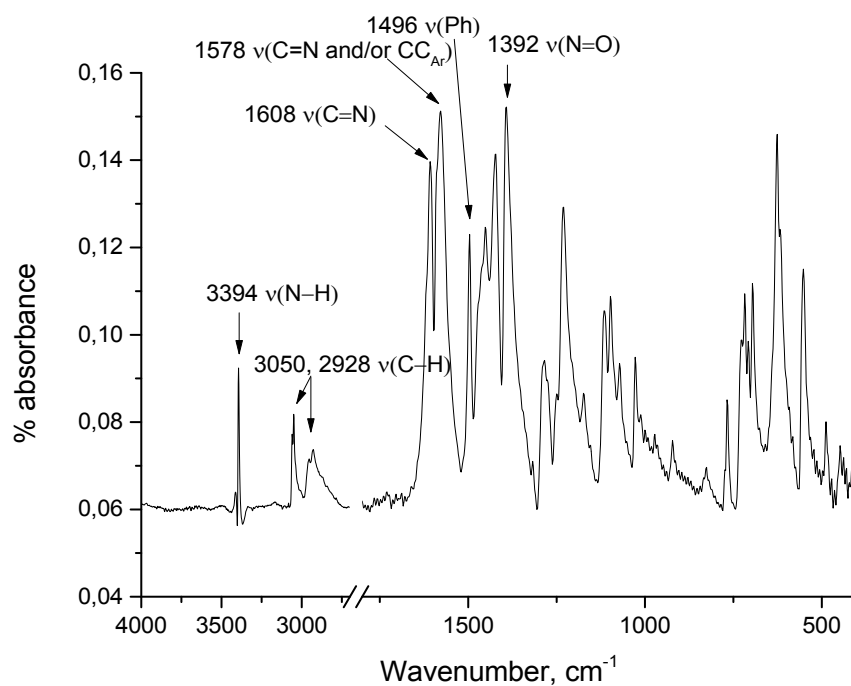

**Figure S27.** The FTIR spectrum of **5**.

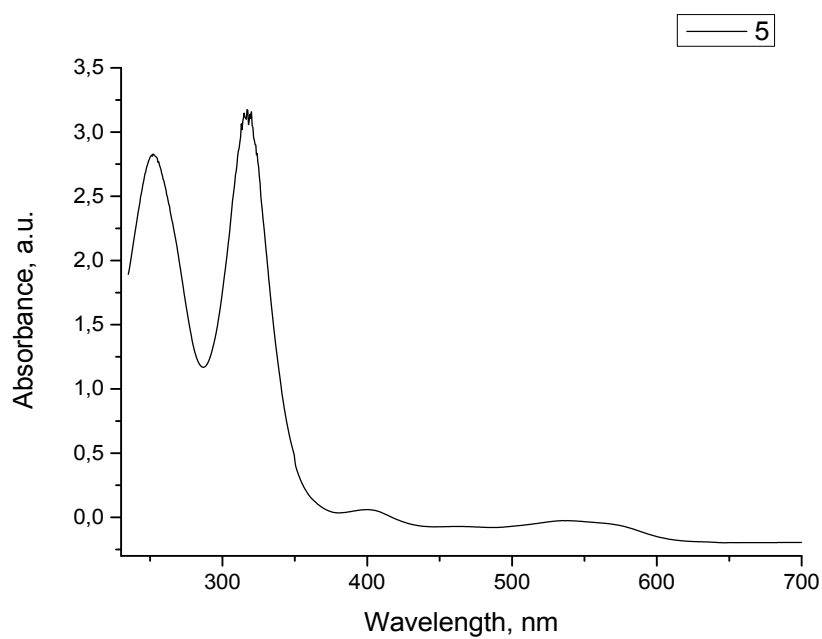

**Figure S28.** The UV-vis absorption spectrum of **5** in dichloromethane.

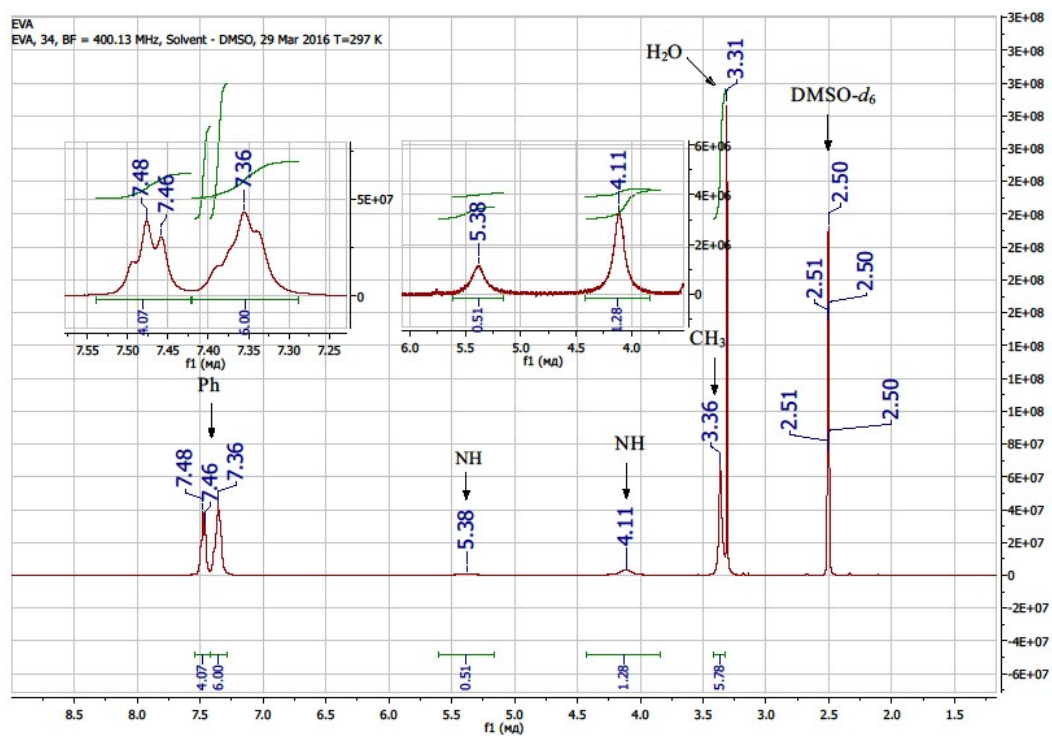

Figure S29. The  $^1\text{H}$  NMR spectrum of **5**.

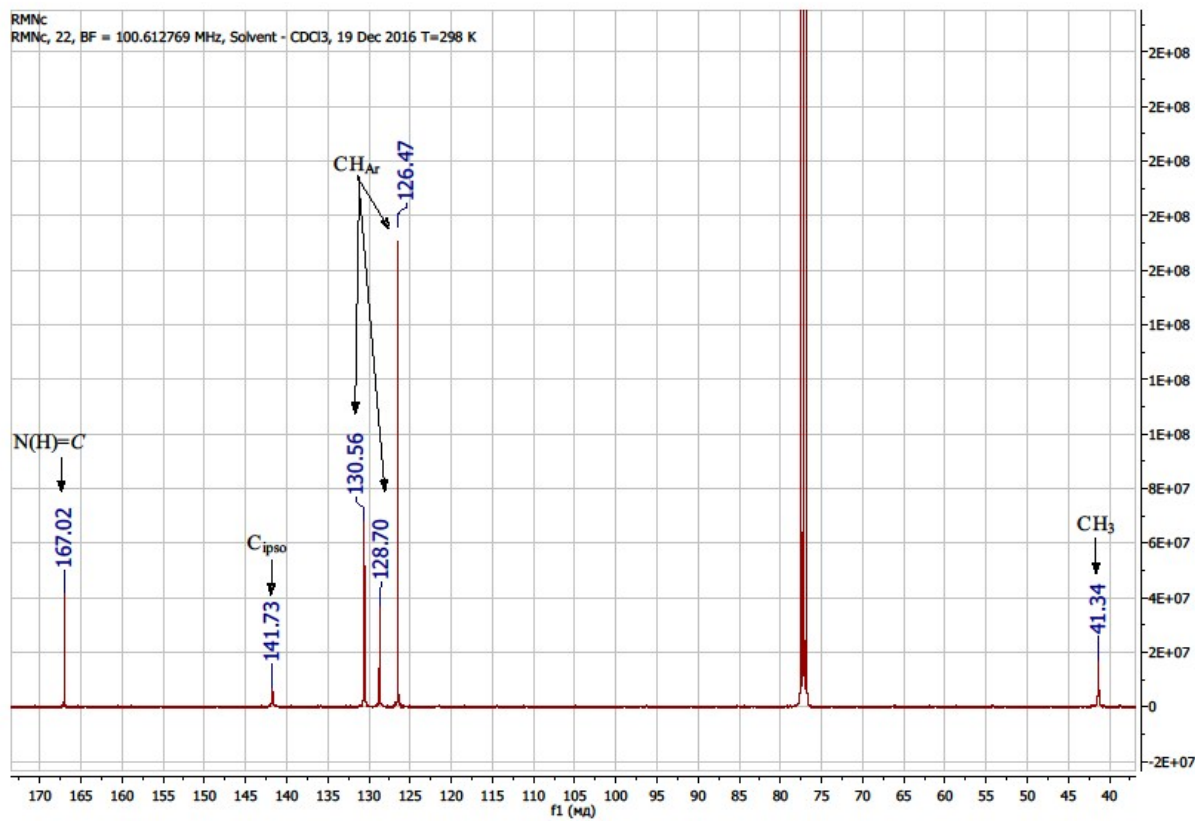

Figure S30. The  $^{13}\text{C}\{^1\text{H}\}$  NMR spectrum of **5**.



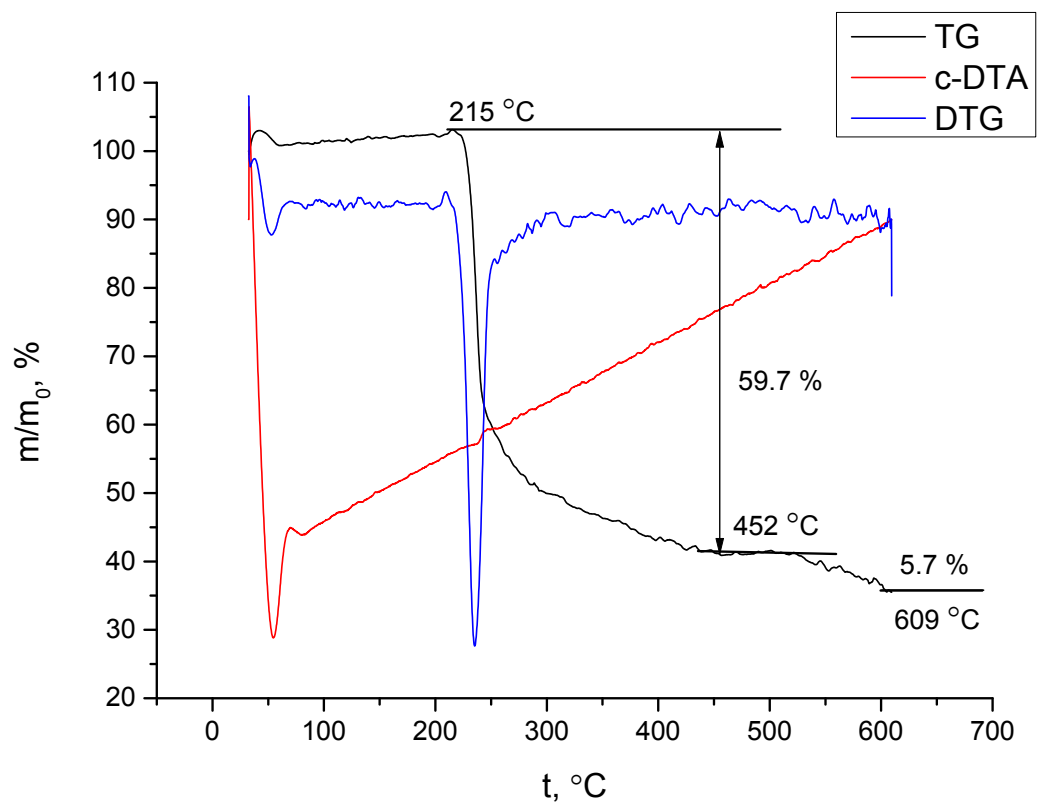

**Figure S31.** TG, dTG and c-DTA curves for the thermal decomposition of **5**.

[Ni{NH=C(NPh<sub>2</sub>)NN(O)}<sub>2</sub>] (**6**, ZBM75)

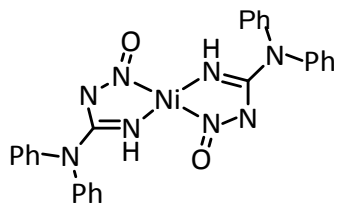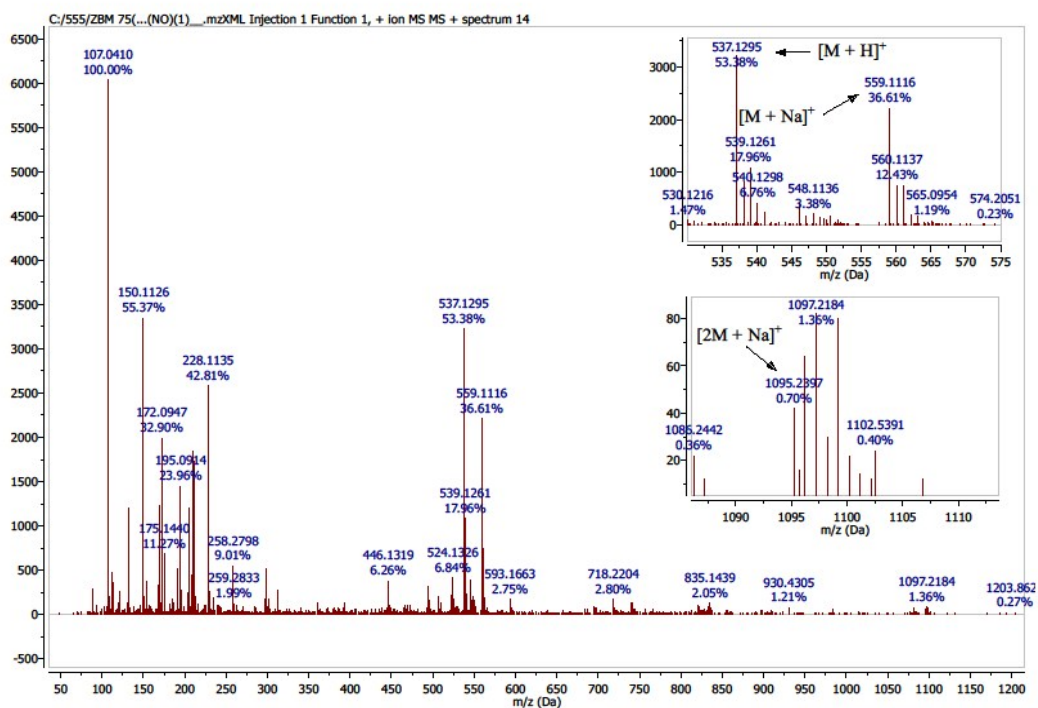

Figure S32. HRESI-MS of **6**.

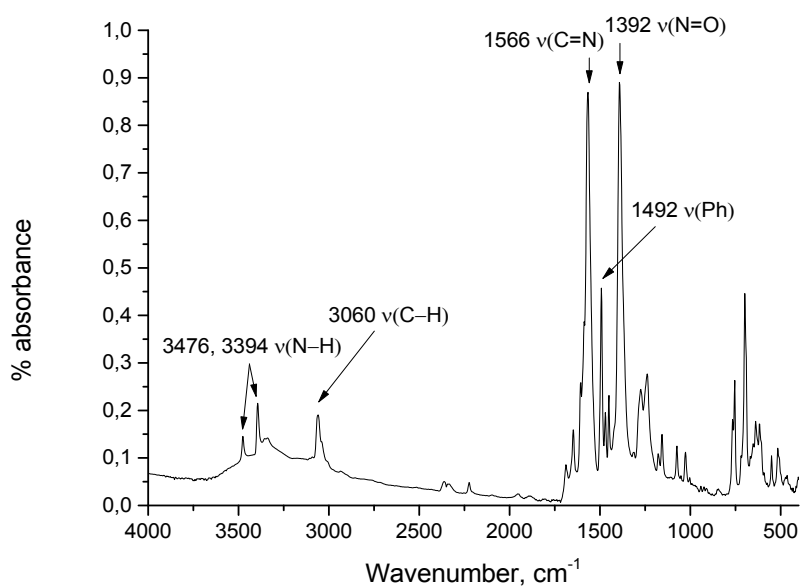

Figure S33. The FTIR spectrum of **6**.

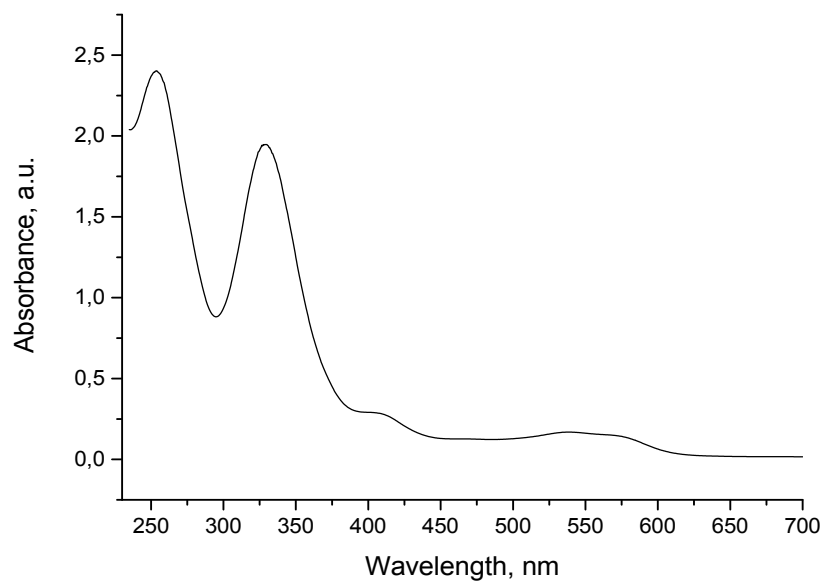

Figure S34. The UV-vis absorption spectrum of **6** in dichloromethane.

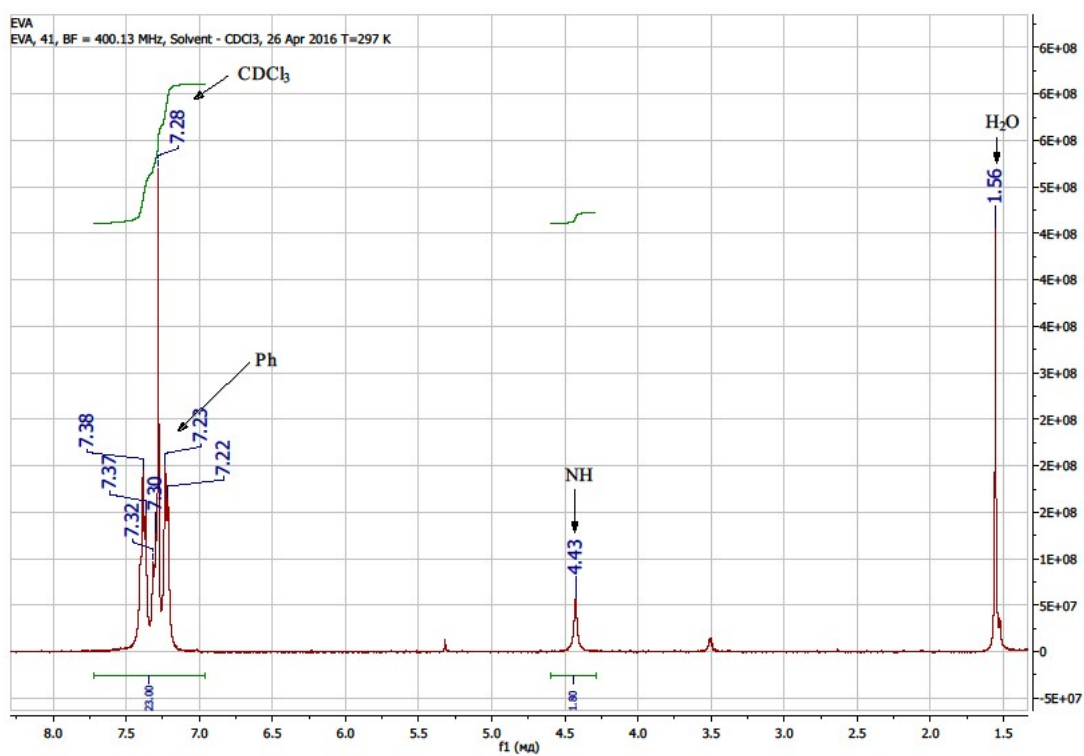

Figure S35. The <sup>1</sup>H NMR spectrum of **6**.

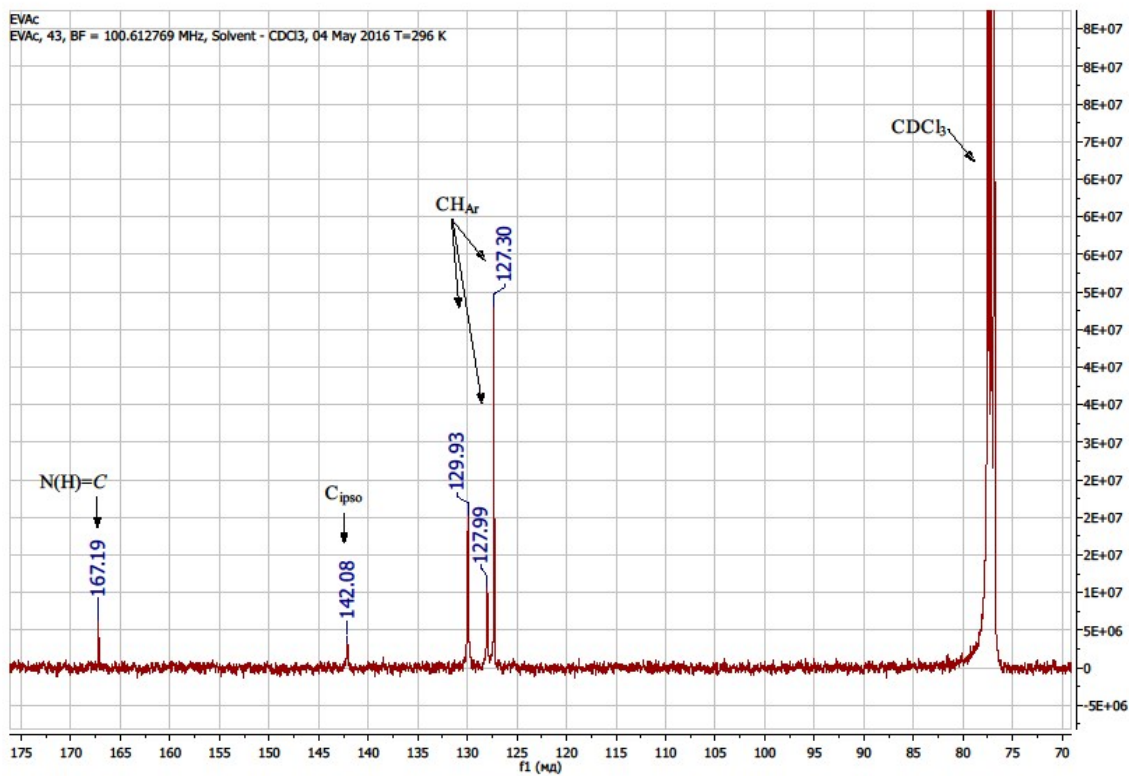

Figure S36. The <sup>13</sup>C{<sup>1</sup>H} NMR spectrum of **6**.

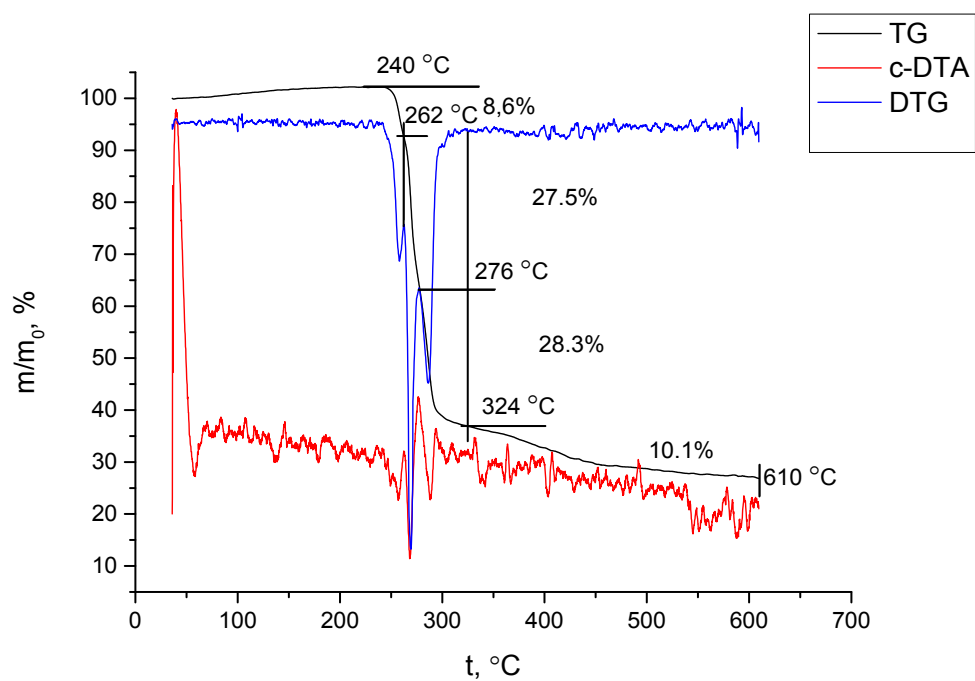

Figure S37. TG, dTG and c-DTA curves for the thermal decomposition of **6**.

[Ni{NH=C(N(*p*-Tol)<sub>2</sub>)NN(O)}<sub>2</sub>] (7, ZBM107)

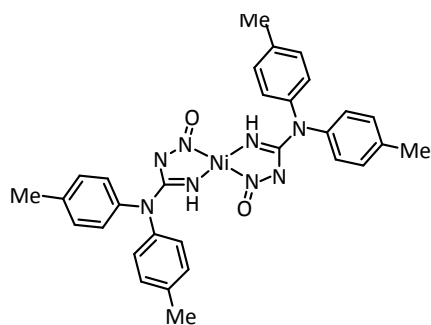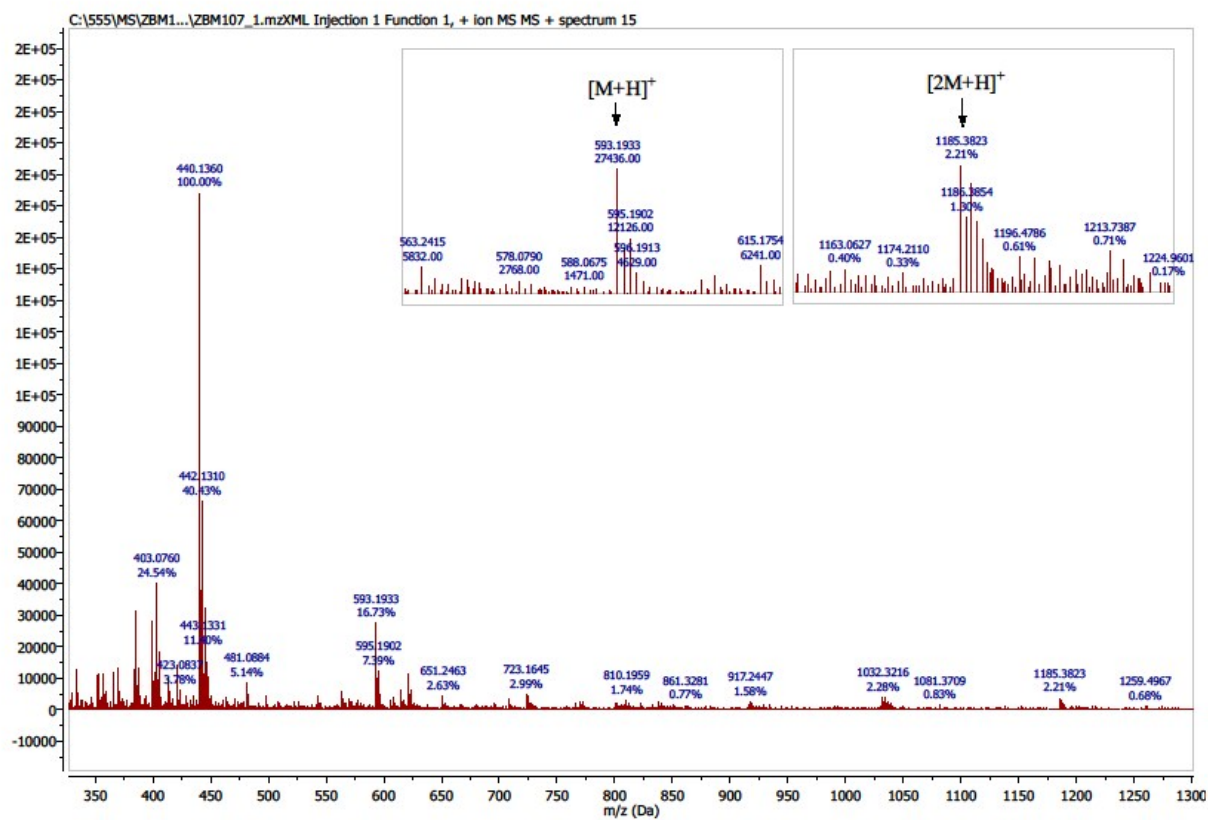

Figure S38. HRESI-MS of 7.

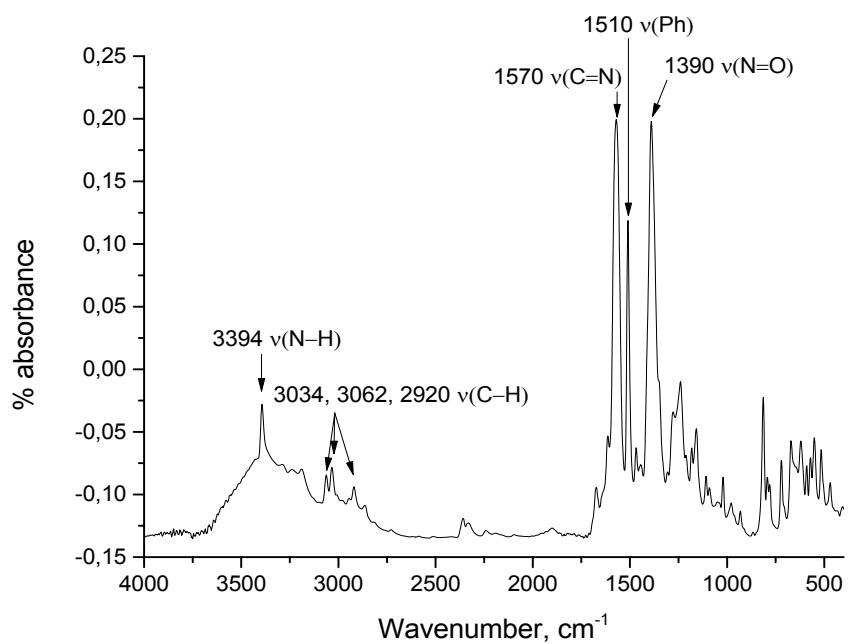

**Figure S39.** The FTIR spectrum of 7.

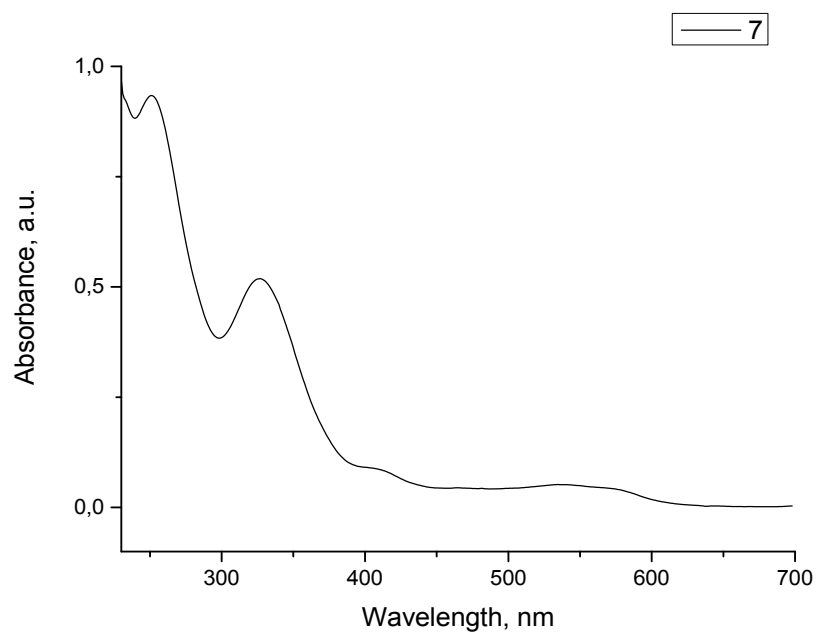

**Figure S40.** The UV-vis absorption spectrum of 7 in dichloromethane.

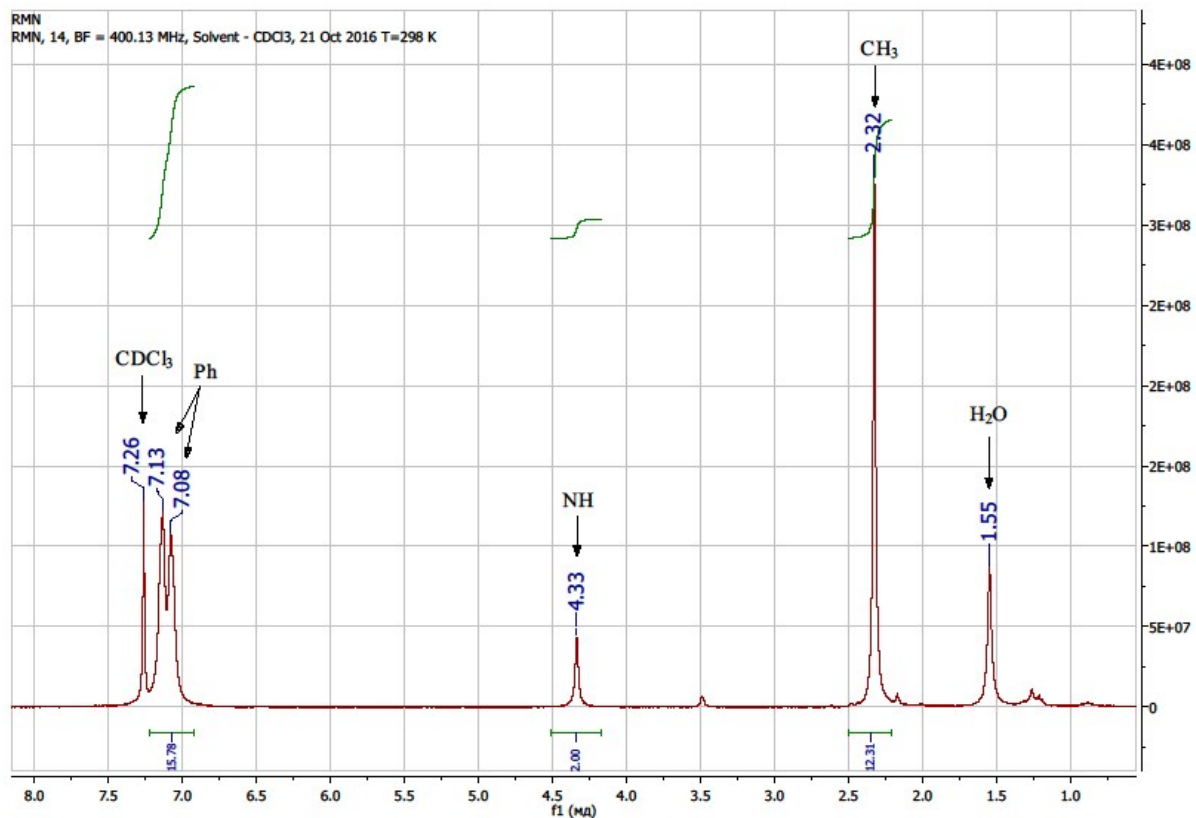

Figure S41. The <sup>1</sup>H NMR spectrum of 7.

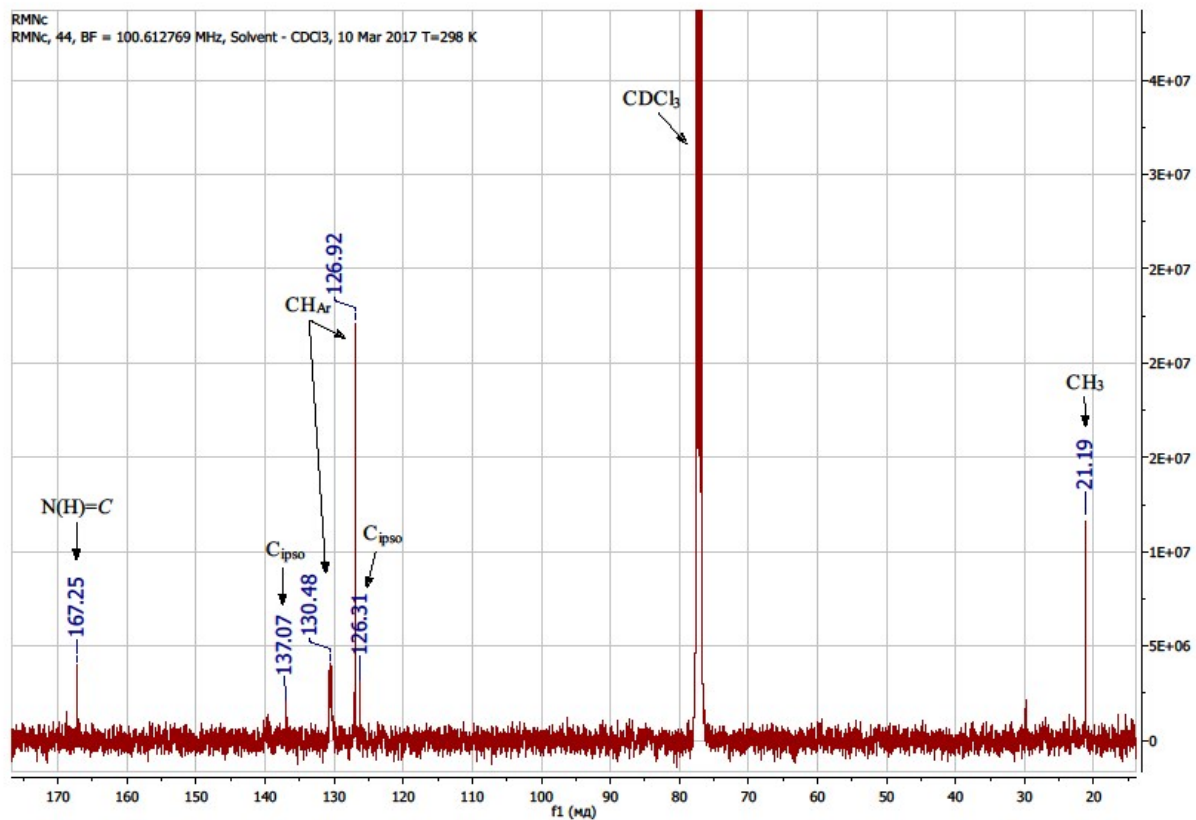

Figure S42. The <sup>13</sup>C{<sup>1</sup>H} NMR spectrum of 7.

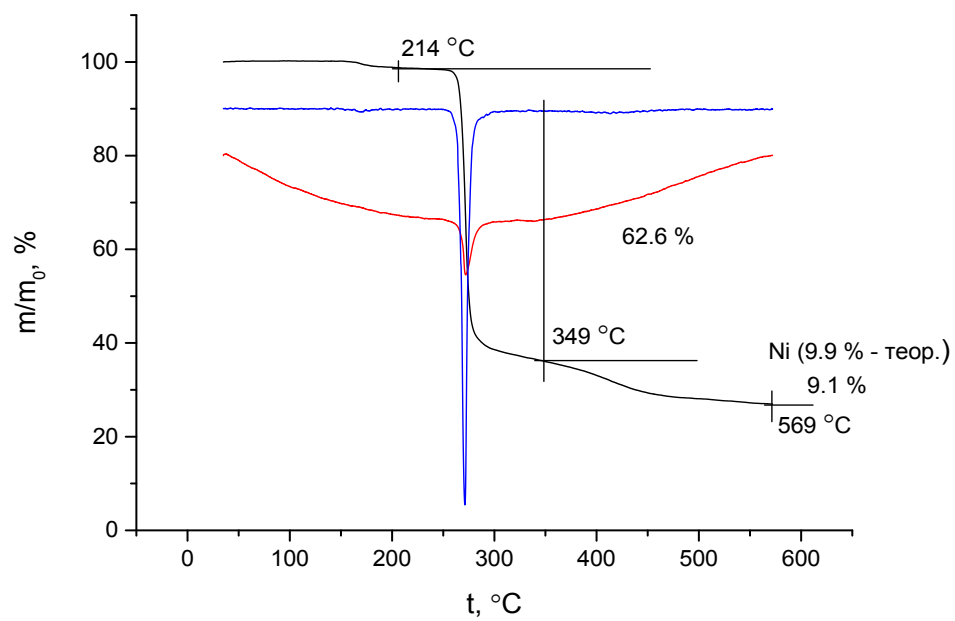

**Figure S43.** TG, dTG and c-DTA curves for the thermal decomposition of 7.



**Molecular structure of  $[\text{Ni}\{\text{NH}=\text{C}(\text{NH}_2)\text{NN}(\text{O})\}_2]$ , **1**, and 3–5**

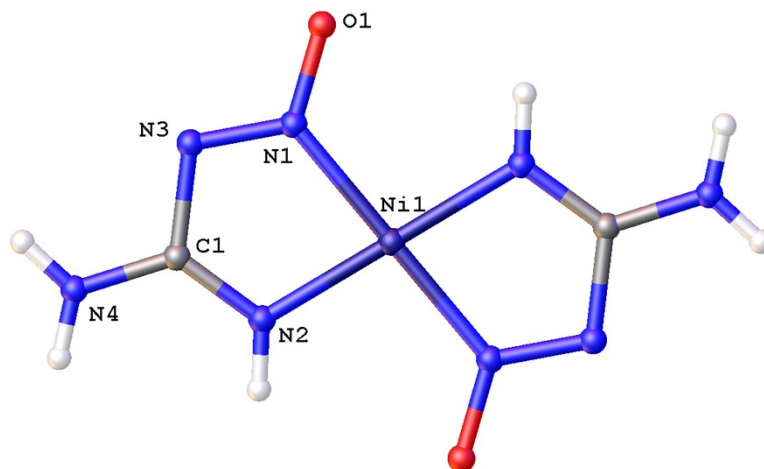

**Figure S44.** Molecular structure of  $[\text{Ni}\{\text{NH}=\text{C}(\text{NH}_2)\text{NN}(\text{O})\}_2]$  (ngH) with the atomic numbering scheme. No atomic displacement parameters (ADP).<sup>8</sup>

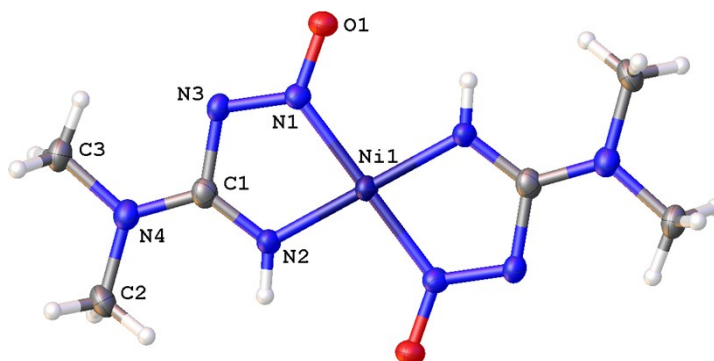

**Figure S45.** Molecular structure of **1** with the atomic numbering scheme. ADP ellipsoids are drawn at the 50% probability level.

---

<sup>8</sup> Murmann, R. K.; Glaser, R.; Barnes, C. L., Structure of the nitrosoguanidine complexes of nickel(II) and copper(II) by X-ray crystallography and computational analysis. *Journal of Coordination Chemistry* **2005**, 58 (3), 279-294.

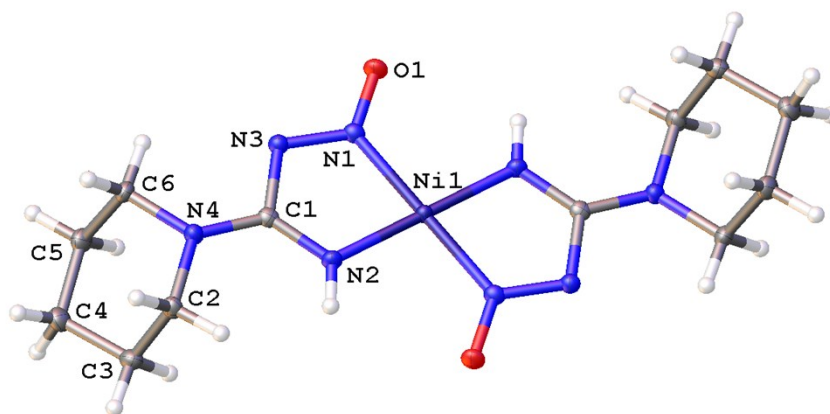

**Figure S46.** Molecular structure of **3** with the atomic numbering scheme. ADP ellipsoids are drawn at the 50% probability level.

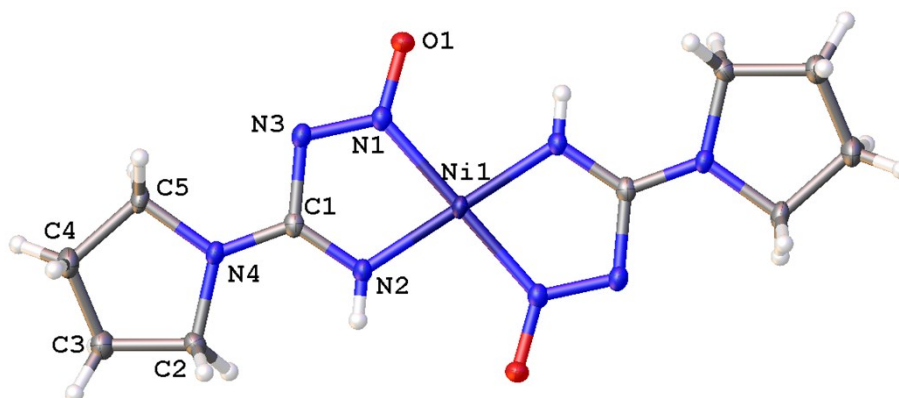

**Figure S47.** Molecular structure of **4** with the atomic numbering scheme. ADP ellipsoids are drawn at the 50% probability level.

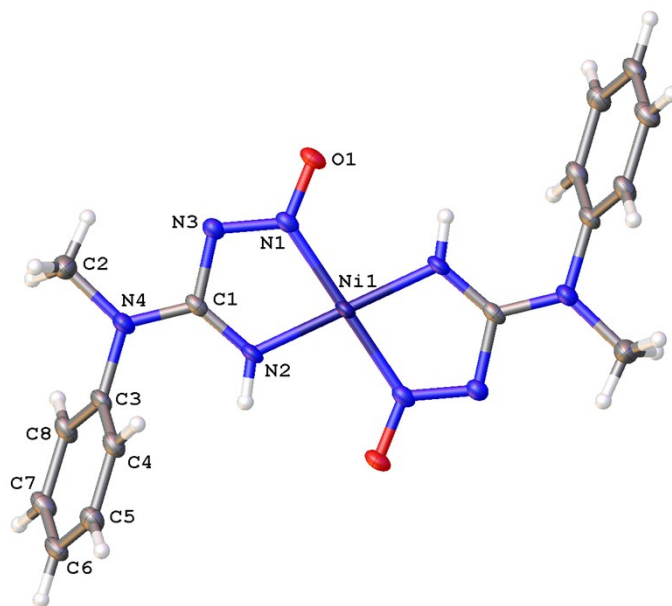

**Figure S48.** Molecular structure of **5** with the atomic numbering scheme. ADP ellipsoids are drawn at the 50% probability level.

### Crystal data and structure refinement for 1 and 3–5

**Table S2.** Crystal data and structure refinement for 1, 3–5.

| Identification code                  | <b>1</b>                                                       | <b>3</b>                                                        | <b>4</b>                                                        | <b>5</b>                                                        |
|--------------------------------------|----------------------------------------------------------------|-----------------------------------------------------------------|-----------------------------------------------------------------|-----------------------------------------------------------------|
| Empirical formula                    | C <sub>6</sub> H <sub>14</sub> N <sub>8</sub> NiO <sub>2</sub> | C <sub>12</sub> H <sub>22</sub> N <sub>8</sub> NiO <sub>2</sub> | C <sub>10</sub> H <sub>18</sub> N <sub>8</sub> NiO <sub>2</sub> | C <sub>16</sub> H <sub>18</sub> N <sub>8</sub> NiO <sub>2</sub> |
| Formula weight                       | 288.96                                                         | 369.08                                                          | 341.03                                                          | 413.09                                                          |
| Temperature/K                        | 100(2)                                                         | 100(2)                                                          | 100(2)                                                          | 100(2)                                                          |
| Crystal system                       | monoclinic                                                     | monoclinic                                                      | triclinic                                                       | triclinic                                                       |
| Space group                          | P2 <sub>1</sub> /c                                             | P2 <sub>1</sub> /n                                              | P-1                                                             | P-1                                                             |
| a/Å                                  | 5.4378(10)                                                     | 6.5790(3)                                                       | 6.7068(10)                                                      | 6.5902(4)                                                       |
| b/Å                                  | 6.6766(12)                                                     | 14.3346(7)                                                      | 6.7518(12)                                                      | 11.1021(7)                                                      |
| c/Å                                  | 15.437(2)                                                      | 8.3734(4)                                                       | 7.8797(10)                                                      | 12.3601(8)                                                      |
| α/°                                  | 90                                                             | 90                                                              | 75.399(13)                                                      | 90.489(5)                                                       |
| β/°                                  | 96.885(16)                                                     | 91.976(5)                                                       | 81.175(12)                                                      | 95.586(5)                                                       |
| γ/°                                  | 90                                                             | 90                                                              | 81.118(14)                                                      | 101.506(5)                                                      |
| Volume/Å <sup>3</sup>                | 556.40(17)                                                     | 789.21(7)                                                       | 338.70(9)                                                       | 881.59(10)                                                      |
| Z                                    | 2                                                              | 2                                                               | 1                                                               | 2                                                               |
| ρ <sub>calc</sub> /g/cm <sup>3</sup> | 1.725                                                          | 1.553                                                           | 1.672                                                           | 1.556                                                           |
| μ/mm <sup>-1</sup>                   | 2.624                                                          | 1.253                                                           | 2.262                                                           | 1.861                                                           |
| F(000)                               | 300.0                                                          | 388.0                                                           | 178.0                                                           | 428.0                                                           |
| Crystal size/mm <sup>3</sup>         | 0.2 × 0.15 × 0.15                                              | 0.1 × 0.1 × 0.1                                                 | 0.2 × 0.1 × 0.1                                                 | 0.15 × 0.1 × 0.1                                                |
| Radiation                            | CuKα (λ = 1.54184)                                             | MoKα (λ = 0.71073)                                              | CuKα (λ = 1.54184)                                              | CuKα (λ = 1.54184)                                              |
| 2θ range for data collection/°       | 11.548 to 144.984                                              | 5.636 to 54.998                                                 | 11.69 to 151.846                                                | 7.19 to 139.988                                                 |
| Index ranges                         | -6 ≤ h ≤ 6, -7 ≤ k ≤ 8, -19 ≤ l ≤ 17                           | -8 ≤ h ≤ 8, -18 ≤ k ≤ 18, -10 ≤ l ≤ 10                          | -8 ≤ h ≤ 8, -8 ≤ k ≤ 8, -9 ≤ l ≤ 9                              | -8 ≤ h ≤ 5, -13 ≤ k ≤ 13, -15 ≤ l ≤ 15                          |
| Reflections collected                | 2788                                                           | 13141                                                           | 2391                                                            | 6966                                                            |
| Independent reflections              | 1105 [R <sub>int</sub> = 0.0542, R <sub>sigma</sub> = 0.0550]  | 1820 [R <sub>int</sub> = 0.0353, R <sub>sigma</sub> = 0.0179]   | 1368 [R <sub>int</sub> = 0.0377, R <sub>sigma</sub> = 0.0464]   | 3301 [R <sub>int</sub> = 0.0723, R <sub>sigma</sub> = 0.0547]   |

|                                                |                                  |                                  |                                  |                                  |
|------------------------------------------------|----------------------------------|----------------------------------|----------------------------------|----------------------------------|
| Data/restraints/parameters                     | 1105/0/81                        | 1820/0/106                       | 1368/0/101                       | 3301/0/249                       |
| Goodness-of-fit on $F^2$                       | 1.073                            | 1.068                            | 1.080                            | 1.092                            |
| Final R indexes [ $I \geq 2\sigma(I)$ ]        | $R_1 = 0.0497$ , $wR_2 = 0.1244$ | $R_1 = 0.0229$ , $wR_2 = 0.0576$ | $R_1 = 0.0376$ , $wR_2 = 0.0923$ | $R_1 = 0.0607$ , $wR_2 = 0.1503$ |
| Final R indexes [all data]                     | $R_1 = 0.0640$ , $wR_2 = 0.1380$ | $R_1 = 0.0253$ , $wR_2 = 0.0591$ | $R_1 = 0.0445$ , $wR_2 = 0.0991$ | $R_1 = 0.0799$ , $wR_2 = 0.1605$ |
| Largest diff. peak/hole / $e \text{ \AA}^{-3}$ | 0.51/-0.56                       | 0.40/-0.24                       | 0.62/-0.37                       | 1.24/-0.60                       |
| CCDC number                                    | 1530063                          | 1530062                          | 1530060                          | 1530064                          |

## Cartesian atomic coordinates of model structures

**Table S3.** Cartesian atomic coordinates of model structures.

| Atom         | X        | Y         | Z         |
|--------------|----------|-----------|-----------|
| <b>5-100</b> |          |           |           |
| Ni           | 5.387071 | -0.352562 | 12.296351 |
| O            | 5.255363 | -2.135535 | 10.183469 |
| N            | 5.160411 | 1.284238  | 11.478644 |
| N            | 5.200828 | -0.944953 | 10.533054 |
| N            | 4.996221 | -0.055978 | 9.578858  |
| N            | 4.743415 | 2.257273  | 9.375968  |
| C            | 4.969013 | 1.209062  | 10.192446 |
| C            | 4.780427 | 3.597706  | 9.902252  |
| C            | 4.838043 | 6.182564  | 10.888419 |
| C            | 5.971010 | 4.120572  | 10.371972 |
| C            | 3.655582 | 5.654575  | 10.407632 |
| C            | 3.617475 | 4.352426  | 9.912089  |
| C            | 4.407784 | 2.098591  | 7.966806  |
| C            | 5.990765 | 5.417947  | 10.882271 |
| O            | 5.518780 | 1.430411  | 14.409233 |
| N            | 5.613732 | -1.989361 | 13.114059 |
| N            | 5.573315 | 0.239829  | 14.059648 |
| N            | 5.777922 | -0.649146 | 15.013845 |
| N            | 6.030728 | -2.962397 | 15.216735 |
| C            | 5.805130 | -1.914186 | 14.400257 |
| C            | 5.993715 | -4.302829 | 14.690451 |
| C            | 5.936099 | -6.887687 | 13.704283 |
| C            | 4.803133 | -4.825696 | 14.220730 |
| C            | 7.118561 | -6.359699 | 14.185071 |
| C            | 7.156668 | -5.057549 | 14.680614 |

|    |          |           |           |
|----|----------|-----------|-----------|
| C  | 6.366359 | -2.803715 | 16.625897 |
| C  | 4.783377 | -6.123071 | 13.710432 |
| H  | 5.179250 | 2.029146  | 11.906557 |
| H  | 4.858960 | 7.052173  | 11.216732 |
| H  | 6.749574 | 3.613193  | 10.348609 |
| H  | 2.881544 | 6.171151  | 10.413780 |
| H  | 2.820852 | 3.992759  | 9.593613  |
| H  | 5.125683 | 2.437175  | 7.426996  |
| H  | 3.603647 | 2.586066  | 7.773753  |
| H  | 4.273116 | 1.168533  | 7.773753  |
| H  | 6.782959 | 5.770557  | 11.219191 |
| H  | 5.594893 | -2.734270 | 12.686146 |
| H  | 5.915183 | -7.757296 | 13.375971 |
| H  | 4.024568 | -4.318317 | 14.244093 |
| H  | 7.892599 | -6.876275 | 14.178923 |
| H  | 7.953291 | -4.697883 | 14.999089 |
| H  | 5.648460 | -3.142298 | 17.165706 |
| H  | 7.170496 | -3.291189 | 16.818949 |
| H  | 6.501027 | -1.873657 | 16.818949 |
| H  | 3.991184 | -6.475681 | 13.373512 |
| Ni | 2.091971 | -0.352562 | 12.296351 |
| O  | 1.750630 | 2.316103  | 11.664811 |
| N  | 2.014014 | -1.191150 | 10.658477 |
| N  | 1.789725 | 1.157759  | 11.222880 |
| N  | 1.620542 | 0.992253  | 9.937911  |
| N  | 1.598698 | -0.758287 | 8.386112  |
| C  | 1.738758 | -0.378077 | 9.657554  |
| C  | 1.816772 | -2.132535 | 8.014762  |
| C  | 1.044693 | 0.134697  | 7.367974  |

|   |           |           |           |
|---|-----------|-----------|-----------|
| C | 0.996396  | -4.313032 | 7.457737  |
| C | 0.751595  | -2.992862 | 7.818020  |
| C | 2.290244  | -4.770282 | 7.317559  |
| C | 3.124810  | -2.583152 | 7.870894  |
| C | 3.356387  | -3.906027 | 7.529056  |
| O | 2.433313  | -3.021227 | 12.927892 |
| N | 2.169929  | 0.486027  | 13.934225 |
| N | 2.394218  | -1.862883 | 13.369823 |
| N | 2.563401  | -1.697377 | 14.654791 |
| N | 2.585245  | 0.053163  | 16.206591 |
| C | 2.445185  | -0.327047 | 14.935148 |
| C | 2.367170  | 1.427412  | 16.577941 |
| C | 3.139250  | -0.839821 | 17.224729 |
| C | 3.187547  | 3.607909  | 17.134965 |
| C | 3.432348  | 2.287738  | 16.774682 |
| C | 1.893699  | 4.065159  | 17.275144 |
| C | 1.059132  | 1.878028  | 16.721808 |
| C | 0.827555  | 3.200903  | 17.063647 |
| H | 2.144229  | -2.034610 | 10.556418 |
| H | 0.149707  | -0.138794 | 7.155247  |
| H | 1.587866  | 0.093181  | 6.577318  |
| H | 1.034423  | 1.034591  | 7.702434  |
| H | 0.283250  | -4.890792 | 7.308951  |
| H | -0.121272 | -2.690265 | 7.926228  |
| H | 2.448127  | -5.656749 | 7.083928  |
| H | 3.838096  | -2.000547 | 8.002465  |
| H | 4.228537  | -4.215751 | 7.441752  |
| H | 2.039714  | 1.329486  | 14.036285 |
| H | 4.034236  | -0.566330 | 17.437456 |



|    |           |           |           |
|----|-----------|-----------|-----------|
| H  | 2.596076  | -0.798304 | 18.015384 |
| H  | 3.149520  | -1.739714 | 16.890268 |
| H  | 3.900693  | 4.185669  | 17.283751 |
| H  | 4.305214  | 1.985141  | 16.666474 |
| H  | 1.735816  | 4.951625  | 17.508775 |
| H  | 0.345847  | 1.295423  | 16.590237 |
| H  | -0.044595 | 3.510627  | 17.150951 |
| Ni | -1.203129 | -0.352562 | 12.296351 |
| O  | -1.334837 | -2.135535 | 10.183469 |
| N  | -1.429789 | 1.284238  | 11.478644 |
| N  | -1.389372 | -0.944953 | 10.533054 |
| N  | -1.593979 | -0.055978 | 9.578858  |
| N  | -1.846785 | 2.257273  | 9.375968  |
| C  | -1.621187 | 1.209062  | 10.192446 |
| C  | -1.809773 | 3.597706  | 9.902252  |
| C  | -1.752157 | 6.182564  | 10.888419 |
| C  | -0.619190 | 4.120572  | 10.371972 |
| C  | -2.934618 | 5.654575  | 10.407632 |
| C  | -2.972725 | 4.352426  | 9.912089  |
| C  | -2.182416 | 2.098591  | 7.966806  |
| C  | -0.599435 | 5.417947  | 10.882271 |
| O  | -1.071420 | 1.430411  | 14.409233 |
| N  | -0.976468 | -1.989361 | 13.114059 |
| N  | -1.016885 | 0.239829  | 14.059648 |
| N  | -0.812278 | -0.649146 | 15.013845 |
| N  | -0.559472 | -2.962397 | 15.216735 |
| C  | -0.785070 | -1.914186 | 14.400257 |
| C  | -0.596485 | -4.302829 | 14.690451 |
| C  | -0.654101 | -6.887687 | 13.704283 |

|    |           |           |           |
|----|-----------|-----------|-----------|
| C  | -1.787067 | -4.825696 | 14.220730 |
| C  | 0.528361  | -6.359699 | 14.185071 |
| C  | 0.566468  | -5.057549 | 14.680614 |
| C  | -0.223841 | -2.803715 | 16.625897 |
| C  | -1.806823 | -6.123071 | 13.710432 |
| H  | -1.410950 | 2.029146  | 11.906557 |
| H  | -1.731240 | 7.052173  | 11.216732 |
| H  | 0.159374  | 3.613193  | 10.348609 |
| H  | -3.708656 | 6.171151  | 10.413780 |
| H  | -3.769348 | 3.992759  | 9.593613  |
| H  | -1.464517 | 2.437175  | 7.426996  |
| H  | -2.986553 | 2.586066  | 7.773753  |
| H  | -2.317084 | 1.168533  | 7.773753  |
| H  | 0.192759  | 5.770557  | 11.219191 |
| H  | -0.995307 | -2.734270 | 12.686146 |
| H  | -0.675017 | -7.757296 | 13.375971 |
| H  | -2.565632 | -4.318317 | 14.244093 |
| H  | 1.302399  | -6.876275 | 14.178923 |
| H  | 1.363091  | -4.697883 | 14.999089 |
| H  | -0.941740 | -3.142298 | 17.165706 |
| H  | 0.580296  | -3.291189 | 16.818949 |
| H  | -0.089173 | -1.873657 | 16.818949 |
| H  | -2.599016 | -6.475681 | 13.373512 |
| Ni | -4.498229 | -0.352562 | 12.296351 |
| O  | -4.839570 | 2.316103  | 11.664811 |
| N  | -4.576186 | -1.191150 | 10.658477 |
| N  | -4.800475 | 1.157759  | 11.222880 |
| N  | -4.969658 | 0.992253  | 9.937911  |
| N  | -4.991502 | -0.758287 | 8.386112  |

|   |           |           |           |
|---|-----------|-----------|-----------|
| C | -4.851442 | -0.378077 | 9.657554  |
| C | -4.773428 | -2.132535 | 8.014762  |
| C | -5.545507 | 0.134697  | 7.367974  |
| C | -5.593804 | -4.313032 | 7.457737  |
| C | -5.838605 | -2.992862 | 7.818020  |
| C | -4.299956 | -4.770282 | 7.317559  |
| C | -3.465390 | -2.583152 | 7.870894  |
| C | -3.233813 | -3.906027 | 7.529056  |
| O | -4.156887 | -3.021227 | 12.927892 |
| N | -4.420271 | 0.486027  | 13.934225 |
| N | -4.195982 | -1.862883 | 13.369823 |
| N | -4.026799 | -1.697377 | 14.654791 |
| N | -4.004955 | 0.053163  | 16.206591 |
| C | -4.145015 | -0.327047 | 14.935148 |
| C | -4.223030 | 1.427412  | 16.577941 |
| C | -3.450950 | -0.839821 | 17.224729 |
| C | -3.402653 | 3.607909  | 17.134965 |
| C | -3.157852 | 2.287738  | 16.774682 |
| C | -4.696501 | 4.065159  | 17.275144 |
| C | -5.531068 | 1.878028  | 16.721808 |
| C | -5.762645 | 3.200903  | 17.063647 |
| H | -4.445971 | -2.034610 | 10.556418 |
| H | -6.440493 | -0.138794 | 7.155247  |
| H | -5.002334 | 0.093181  | 6.577318  |
| H | -5.555777 | 1.034591  | 7.702434  |
| H | -6.306950 | -4.890792 | 7.308951  |
| H | -6.711472 | -2.690265 | 7.926228  |
| H | -4.142073 | -5.656749 | 7.083928  |
| H | -2.752104 | -2.000547 | 8.002465  |

|             |           |           |           |
|-------------|-----------|-----------|-----------|
| H           | -2.361663 | -4.215751 | 7.441752  |
| H           | -4.550486 | 1.329486  | 14.036285 |
| H           | -2.555964 | -0.566330 | 17.437456 |
| H           | -3.994124 | -0.798304 | 18.015384 |
| H           | -3.440680 | -1.739714 | 16.890268 |
| H           | -2.689507 | 4.185669  | 17.283751 |
| H           | -2.284986 | 1.985141  | 16.666474 |
| H           | -4.854384 | 4.951625  | 17.508775 |
| H           | -6.244353 | 1.295423  | 16.590237 |
| H           | -6.634795 | 3.510627  | 17.150951 |
| <b>5-RT</b> |           |           |           |
| Ni          | 9.668991  | 5.117347  | 12.395428 |
| O           | 9.537232  | 3.363021  | 10.265894 |
| N           | 9.118555  | 7.756673  | 9.491179  |
| N           | 9.490796  | 4.548156  | 10.620403 |
| N           | 9.475382  | 6.762464  | 11.586007 |
| N           | 9.314545  | 5.450499  | 9.680829  |
| C           | 9.305222  | 6.702469  | 10.295643 |
| C           | 9.156433  | 9.095918  | 10.015506 |
| C           | 10.358456 | 9.612486  | 10.474137 |
| C           | 8.007339  | 9.861628  | 10.040297 |
| C           | 10.391408 | 10.909765 | 10.969954 |
| C           | 8.068348  | 11.171620 | 10.515042 |
| C           | 9.257290  | 11.688113 | 10.976152 |
| C           | 8.801947  | 7.612488  | 8.079340  |
| O           | 9.800750  | 6.871672  | 14.524963 |
| N           | 10.219427 | 2.478020  | 15.299677 |
| N           | 9.847185  | 5.686538  | 14.170454 |
| N           | 9.862600  | 3.472230  | 13.204850 |

|    |           |           |           |
|----|-----------|-----------|-----------|
| N  | 10.023436 | 4.784195  | 15.110027 |
| C  | 10.032760 | 3.532224  | 14.495214 |
| C  | 10.181548 | 1.138775  | 14.775350 |
| C  | 8.979526  | 0.622207  | 14.316720 |
| C  | 11.330643 | 0.373065  | 14.750560 |
| C  | 8.946574  | -0.675071 | 13.820902 |
| C  | 11.269634 | -0.936926 | 14.275815 |
| C  | 10.080692 | -1.453420 | 13.814705 |
| C  | 10.536035 | 2.622205  | 16.711516 |
| H  | 9.496388  | 7.503748  | 12.021086 |
| H  | 11.131863 | 9.098161  | 10.451825 |
| H  | 7.200538  | 9.507081  | 9.744046  |
| H  | 11.189144 | 11.255618 | 11.299672 |
| H  | 7.302536  | 11.698584 | 10.518760 |
| H  | 9.294215  | 12.561453 | 11.292235 |
| H  | 9.602791  | 7.717062  | 7.559972  |
| H  | 8.165064  | 8.284508  | 7.823994  |
| H  | 8.429693  | 6.742060  | 7.921918  |
| H  | 9.841593  | 2.730945  | 12.769770 |
| H  | 8.206119  | 1.136533  | 14.339031 |
| H  | 12.137444 | 0.727612  | 15.046810 |
| H  | 8.148838  | -1.020925 | 13.491184 |
| H  | 12.035446 | -1.463890 | 14.272096 |
| H  | 10.043766 | -2.326760 | 13.498621 |
| H  | 9.735191  | 2.517631  | 17.230885 |
| H  | 11.172917 | 1.950186  | 16.966862 |
| H  | 10.908289 | 3.492634  | 16.868938 |
| Ni | 6.313841  | 5.117347  | 12.395428 |
| O  | 6.021323  | 7.784314  | 11.747147 |

|   |          |          |           |
|---|----------|----------|-----------|
| N | 6.245989 | 4.289038 | 10.765429 |
| N | 6.054457 | 6.627734 | 11.319505 |
| N | 5.882513 | 4.716895 | 8.479712  |
| N | 5.905540 | 6.459217 | 10.022943 |
| C | 6.009513 | 5.094308 | 9.767597  |
| C | 6.090928 | 3.346707 | 8.107850  |
| C | 5.427339 | 5.639567 | 7.448413  |
| C | 7.372292 | 2.877450 | 7.938032  |
| C | 5.019753 | 2.495954 | 7.916960  |
| C | 6.530853 | 0.723267 | 7.382717  |
| C | 5.253473 | 1.183964 | 7.545097  |
| C | 7.576869 | 1.573946 | 7.576086  |
| O | 6.606359 | 2.450379 | 13.043709 |
| N | 6.381693 | 5.945655 | 14.025427 |
| N | 6.573225 | 3.606959 | 13.471351 |
| N | 6.745168 | 5.517799 | 16.311144 |
| N | 6.722142 | 3.775477 | 14.767913 |
| C | 6.618169 | 5.140386 | 15.023259 |
| C | 6.536754 | 6.887986 | 16.683007 |
| C | 7.200343 | 4.595126 | 17.342444 |
| C | 5.255390 | 7.357244 | 16.852824 |
| C | 7.607929 | 7.738740 | 16.873896 |
| C | 6.096829 | 9.511426 | 17.408139 |
| C | 7.374208 | 9.050729 | 17.245759 |
| C | 5.050813 | 8.660747 | 17.214771 |
| H | 6.361089 | 3.443248 | 10.665026 |
| H | 4.652080 | 5.277119 | 7.013333  |
| H | 6.125729 | 5.768810 | 6.802611  |
| H | 5.203679 | 6.482882 | 7.850025  |

|    |           |           |           |
|----|-----------|-----------|-----------|
| H  | 8.097878  | 3.444532  | 8.068184  |
| H  | 4.149498  | 2.803091  | 8.037196  |
| H  | 6.684312  | -0.162231 | 7.142246  |
| H  | 4.534641  | 0.610630  | 7.403789  |
| H  | 8.445572  | 1.263329  | 7.462048  |
| H  | 6.266592  | 6.791446  | 14.125830 |
| H  | 7.975602  | 4.957574  | 17.777523 |
| H  | 6.501953  | 4.465884  | 17.988245 |
| H  | 7.424003  | 3.751812  | 16.940832 |
| H  | 4.529804  | 6.790162  | 16.722672 |
| H  | 8.478184  | 7.431603  | 16.753661 |
| H  | 5.943370  | 10.396924 | 17.648611 |
| H  | 8.093041  | 9.624064  | 17.387067 |
| H  | 4.182109  | 8.971365  | 17.328809 |
| Ni | 13.024141 | 5.117347  | 12.395428 |
| O  | 12.731623 | 7.784314  | 11.747147 |
| N  | 12.956289 | 4.289038  | 10.765429 |
| N  | 12.764757 | 6.627734  | 11.319505 |
| N  | 12.592813 | 4.716895  | 8.479712  |
| N  | 12.615840 | 6.459217  | 10.022943 |
| C  | 12.719813 | 5.094308  | 9.767597  |
| C  | 12.801228 | 3.346707  | 8.107850  |
| C  | 12.137639 | 5.639567  | 7.448413  |
| C  | 14.082592 | 2.877450  | 7.938032  |
| C  | 11.730053 | 2.495954  | 7.916960  |
| C  | 13.241153 | 0.723267  | 7.382717  |
| C  | 11.963773 | 1.183964  | 7.545097  |
| C  | 14.287169 | 1.573946  | 7.576086  |
| O  | 13.316659 | 2.450379  | 13.043709 |

|   |           |           |           |
|---|-----------|-----------|-----------|
| N | 13.091993 | 5.945655  | 14.025427 |
| N | 13.283525 | 3.606959  | 13.471351 |
| N | 13.455468 | 5.517799  | 16.311144 |
| N | 13.432442 | 3.775477  | 14.767913 |
| C | 13.328469 | 5.140386  | 15.023259 |
| C | 13.247054 | 6.887986  | 16.683007 |
| C | 13.910643 | 4.595126  | 17.342444 |
| C | 11.965690 | 7.357244  | 16.852824 |
| C | 14.318229 | 7.738740  | 16.873896 |
| C | 12.807129 | 9.511426  | 17.408139 |
| C | 14.084508 | 9.050729  | 17.245759 |
| C | 11.761113 | 8.660747  | 17.214771 |
| H | 13.071389 | 3.443248  | 10.665026 |
| H | 11.362380 | 5.277119  | 7.013333  |
| H | 12.836029 | 5.768810  | 6.802611  |
| H | 11.913979 | 6.482882  | 7.850025  |
| H | 14.808178 | 3.444532  | 8.068184  |
| H | 10.859798 | 2.803091  | 8.037196  |
| H | 13.394612 | -0.162231 | 7.142246  |
| H | 11.244941 | 0.610630  | 7.403789  |
| H | 15.155872 | 1.263329  | 7.462048  |
| H | 12.976892 | 6.791446  | 14.125830 |
| H | 14.685902 | 4.957574  | 17.777523 |
| H | 13.212253 | 4.465884  | 17.988245 |
| H | 14.134303 | 3.751812  | 16.940832 |
| H | 11.240104 | 6.790162  | 16.722672 |
| H | 15.188484 | 7.431603  | 16.753661 |
| H | 12.653670 | 10.396924 | 17.648611 |
| H | 14.803341 | 9.624064  | 17.387067 |



|    |           |           |           |
|----|-----------|-----------|-----------|
| H  | 10.892409 | 8.971365  | 17.328809 |
| Ni | 16.379291 | 5.117347  | 12.395428 |
| O  | 16.247532 | 3.363021  | 10.265894 |
| N  | 15.828855 | 7.756673  | 9.491179  |
| N  | 16.201096 | 4.548156  | 10.620403 |
| N  | 16.185682 | 6.762464  | 11.586007 |
| N  | 16.024845 | 5.450499  | 9.680829  |
| C  | 16.015522 | 6.702469  | 10.295643 |
| C  | 15.866733 | 9.095918  | 10.015506 |
| C  | 17.068756 | 9.612486  | 10.474137 |
| C  | 14.717639 | 9.861628  | 10.040297 |
| C  | 17.101708 | 10.909765 | 10.969954 |
| C  | 14.778648 | 11.171620 | 10.515042 |
| C  | 15.967590 | 11.688113 | 10.976152 |
| C  | 15.512247 | 7.612488  | 8.079340  |
| O  | 16.511050 | 6.871672  | 14.524963 |
| N  | 16.929727 | 2.478020  | 15.299677 |
| N  | 16.557485 | 5.686538  | 14.170454 |
| N  | 16.572900 | 3.472230  | 13.204850 |
| N  | 16.733736 | 4.784195  | 15.110027 |
| C  | 16.743060 | 3.532224  | 14.495214 |
| C  | 16.891848 | 1.138775  | 14.775350 |
| C  | 15.689826 | 0.622207  | 14.316720 |
| C  | 18.040943 | 0.373065  | 14.750560 |
| C  | 15.656874 | -0.675071 | 13.820902 |
| C  | 17.979934 | -0.936926 | 14.275815 |
| C  | 16.790992 | -1.453420 | 13.814705 |
| C  | 17.246335 | 2.622205  | 16.711516 |
| H  | 16.206688 | 7.503748  | 12.021086 |

|                                                             |           |           |           |
|-------------------------------------------------------------|-----------|-----------|-----------|
| H                                                           | 17.842163 | 9.098161  | 10.451825 |
| H                                                           | 13.910838 | 9.507081  | 9.744046  |
| H                                                           | 17.899444 | 11.255618 | 11.299672 |
| H                                                           | 14.012836 | 11.698584 | 10.518760 |
| H                                                           | 16.004515 | 12.561453 | 11.292235 |
| H                                                           | 16.313091 | 7.717062  | 7.559972  |
| H                                                           | 14.875364 | 8.284508  | 7.823994  |
| H                                                           | 15.139993 | 6.742060  | 7.921918  |
| H                                                           | 16.551893 | 2.730945  | 12.769770 |
| H                                                           | 14.916419 | 1.136533  | 14.339031 |
| H                                                           | 18.847744 | 0.727612  | 15.046810 |
| H                                                           | 14.859138 | -1.020925 | 13.491184 |
| H                                                           | 18.745746 | -1.463890 | 14.272096 |
| H                                                           | 16.754066 | -2.326760 | 13.498621 |
| H                                                           | 16.445491 | 2.517631  | 17.230885 |
| H                                                           | 17.883217 | 1.950186  | 16.966862 |
| H                                                           | 17.618589 | 3.492634  | 16.868938 |
| <b>1 (equilibrium geometry in dichloromethane solution)</b> |           |           |           |
| Ni                                                          | 0.000000  | 0.000000  | 0.000000  |
| O                                                           | 0.636678  | 2.492035  | 1.032596  |
| N                                                           | 0.926565  | 1.297113  | 1.027607  |
| N                                                           | 1.909865  | 0.896355  | 1.759332  |
| N                                                           | 1.231773  | -1.115315 | 0.821362  |
| H                                                           | 1.336168  | -2.111609 | 0.688324  |
| N                                                           | 3.067358  | -1.056772 | 2.277199  |
| C                                                           | 2.069044  | -0.479115 | 1.608616  |
| C                                                           | 4.016007  | -0.319505 | 3.104008  |
| H                                                           | 3.762659  | 0.734691  | 3.111311  |
| H                                                           | 5.025615  | -0.442982 | 2.705551  |

|                                              |           |           |           |
|----------------------------------------------|-----------|-----------|-----------|
| H                                            | 3.989142  | -0.702592 | 4.126140  |
| C                                            | 3.271444  | -2.492322 | 2.150517  |
| H                                            | 2.391608  | -3.048137 | 2.484348  |
| H                                            | 4.113345  | -2.778928 | 2.775884  |
| H                                            | 3.497298  | -2.769167 | 1.117141  |
| O                                            | -0.636678 | -2.492035 | -1.032596 |
| N                                            | -0.926565 | -1.297113 | -1.027607 |
| N                                            | -1.909865 | -0.896355 | -1.759332 |
| N                                            | -1.231773 | 1.115315  | -0.821362 |
| H                                            | -1.336168 | 2.111609  | -0.688324 |
| N                                            | -3.067358 | 1.056772  | -2.277199 |
| C                                            | -2.069044 | 0.479115  | -1.608616 |
| C                                            | -4.016007 | 0.319505  | -3.104008 |
| H                                            | -3.762659 | -0.734691 | -3.111311 |
| H                                            | -5.025615 | 0.442982  | -2.705551 |
| H                                            | -3.989142 | 0.702592  | -4.126140 |
| C                                            | -3.271444 | 2.492322  | -2.150517 |
| H                                            | -2.391608 | 3.048137  | -2.484348 |
| H                                            | -4.113345 | 2.778928  | -2.775884 |
| H                                            | -3.497298 | 2.769167  | -1.117141 |
| <b>1 (equilibrium geometry in gas phase)</b> |           |           |           |
| Ni                                           | 0.000001  | 0.000045  | -0.021444 |
| O                                            | 0.584064  | 2.702667  | -0.015421 |
| N                                            | 1.056696  | 1.581969  | -0.016513 |
| N                                            | 2.351268  | 1.440445  | -0.010620 |
| N                                            | 1.676025  | -0.782746 | -0.019232 |
| H                                            | 1.865823  | -1.777062 | -0.005610 |
| N                                            | 3.960552  | -0.231677 | -0.018002 |
| C                                            | 2.652834  | 0.092901  | -0.013700 |

|                                              |           |           |           |
|----------------------------------------------|-----------|-----------|-----------|
| C                                            | 5.017894  | 0.756541  | 0.091977  |
| H                                            | 4.594549  | 1.756386  | 0.025722  |
| H                                            | 5.743407  | 0.620190  | -0.717977 |
| H                                            | 5.542255  | 0.654043  | 1.050526  |
| C                                            | 4.343957  | -1.625308 | 0.003990  |
| H                                            | 4.035265  | -2.122026 | 0.933677  |
| H                                            | 5.430562  | -1.694089 | -0.070323 |
| H                                            | 3.915439  | -2.172762 | -0.843938 |
| O                                            | -0.583957 | -2.702622 | -0.014778 |
| N                                            | -1.056617 | -1.581947 | -0.016006 |
| N                                            | -2.351208 | -1.440460 | -0.009987 |
| N                                            | -1.676084 | 0.782784  | -0.018608 |
| H                                            | -1.866003 | 1.777080  | -0.005224 |
| N                                            | -3.960537 | 0.231632  | -0.016888 |
| C                                            | -2.652824 | -0.092939 | -0.012990 |
| C                                            | -5.018066 | -0.756667 | 0.090296  |
| H                                            | -4.594379 | -1.756487 | 0.025907  |
| H                                            | -5.545301 | -0.653654 | 1.047189  |
| H                                            | -5.741210 | -0.620951 | -0.721907 |
| C                                            | -4.343929 | 1.625288  | 0.004482  |
| H                                            | -3.916975 | 2.172054  | -0.844710 |
| H                                            | -5.430674 | 1.693975  | -0.067788 |
| H                                            | -4.033510 | 2.122777  | 0.933154  |
| <b>3 (equilibrium geometry in gas phase)</b> |           |           |           |
| Ni                                           | -0.000077 | -0.000011 | 0.000206  |
| O                                            | 0.398958  | 2.731248  | 0.154708  |
| N                                            | 0.931652  | 1.656415  | -0.048581 |
| N                                            | 1.688892  | -0.637129 | -0.403736 |
| H                                            | 1.938287  | -1.611180 | -0.516977 |

|   |           |           |           |
|---|-----------|-----------|-----------|
| N | 3.890683  | 0.123332  | -0.831455 |
| N | 2.205722  | 1.622381  | -0.314967 |
| C | 2.589917  | 0.309435  | -0.513578 |
| C | 4.886485  | 1.168833  | -0.588592 |
| H | 4.399487  | 2.141884  | -0.644166 |
| H | 5.625577  | 1.109816  | -1.400939 |
| C | 4.478121  | -1.207627 | -0.861297 |
| H | 5.240538  | -1.209361 | -1.653655 |
| H | 3.733735  | -1.950808 | -1.158347 |
| C | 5.118742  | -1.529471 | 0.481154  |
| H | 5.579404  | -2.524680 | 0.447673  |
| H | 4.332665  | -1.568910 | 1.250197  |
| C | 5.554282  | 0.936048  | 0.757927  |
| H | 4.799435  | 1.074265  | 1.546892  |
| H | 6.327181  | 1.696625  | 0.925314  |
| C | 6.149766  | -0.464623 | 0.838237  |
| H | 6.996254  | -0.537310 | 0.136389  |
| H | 6.564207  | -0.651610 | 1.836176  |
| O | -0.398688 | -2.731315 | -0.153345 |
| N | -0.931679 | -1.656425 | 0.048939  |
| N | -1.689321 | 0.637181  | 0.402938  |
| H | -1.938243 | 1.610798  | 0.520856  |
| N | -3.890856 | -0.123316 | 0.832073  |
| N | -2.206084 | -1.622299 | 0.313851  |
| C | -2.590217 | -0.309457 | 0.513180  |
| C | -4.886939 | -1.168697 | 0.588848  |
| H | -4.400197 | -2.141835 | 0.645023  |
| H | -5.626322 | -1.109234 | 1.400896  |
| C | -4.478233 | 1.207733  | 0.861069  |

|                                              |           |           |           |
|----------------------------------------------|-----------|-----------|-----------|
| H                                            | -5.241034 | 1.209751  | 1.653091  |
| H                                            | -3.734006 | 1.950915  | 1.158648  |
| C                                            | -5.118000 | 1.529347  | -0.481756 |
| H                                            | -5.578509 | 2.524632  | -0.448755 |
| H                                            | -4.331519 | 1.568507  | -1.250406 |
| C                                            | -5.554027 | -0.936160 | -0.758005 |
| H                                            | -4.798905 | -1.074939 | -1.546590 |
| H                                            | -6.327139 | -1.696533 | -0.925350 |
| C                                            | -6.149062 | 0.464637  | -0.839060 |
| H                                            | -6.995899 | 0.537692  | -0.137619 |
| H                                            | -6.563061 | 0.651366  | -1.837212 |
| <b>4 (equilibrium geometry in gas phase)</b> |           |           |           |
| Ni                                           | 0.000000  | 0.000000  | 0.000000  |
| O                                            | -1.351420 | -2.315238 | 0.692427  |
| N                                            | -2.317518 | -0.506470 | 1.410245  |
| N                                            | -3.030338 | 1.607049  | 1.976644  |
| N                                            | -1.048873 | 1.330431  | 0.745195  |
| C                                            | -4.228023 | 1.073082  | 2.631398  |
| H                                            | -3.961978 | 0.627795  | 3.600442  |
| H                                            | -4.680842 | 0.287457  | 2.022834  |
| N                                            | -1.351053 | -1.101511 | 0.769750  |
| C                                            | -2.105232 | 0.857034  | 1.363028  |
| C                                            | -2.949438 | 3.059260  | 2.059878  |
| H                                            | -3.108806 | 3.509204  | 1.067171  |
| H                                            | -1.961333 | 3.378878  | 2.415470  |
| C                                            | -5.092219 | 2.312079  | 2.796605  |
| H                                            | -5.651698 | 2.503945  | 1.871495  |
| H                                            | -5.817718 | 2.213538  | 3.609081  |
| C                                            | -4.069126 | 3.416795  | 3.027972  |

|                                              |           |           |           |
|----------------------------------------------|-----------|-----------|-----------|
| H                                            | -4.461871 | 4.423553  | 2.860676  |
| H                                            | -3.696090 | 3.372796  | 4.059290  |
| H                                            | -0.890825 | 2.329365  | 0.687198  |
| O                                            | 1.351420  | 2.315238  | -0.692427 |
| N                                            | 2.317518  | 0.506470  | -1.410245 |
| N                                            | 3.030338  | -1.607049 | -1.976644 |
| N                                            | 1.048873  | -1.330431 | -0.745195 |
| C                                            | 4.228023  | -1.073082 | -2.631398 |
| H                                            | 3.961978  | -0.627795 | -3.600442 |
| H                                            | 4.680842  | -0.287457 | -2.022834 |
| N                                            | 1.351053  | 1.101511  | -0.769750 |
| C                                            | 2.105232  | -0.857034 | -1.363028 |
| C                                            | 2.949438  | -3.059260 | -2.059878 |
| H                                            | 3.108806  | -3.509204 | -1.067171 |
| H                                            | 1.961333  | -3.378878 | -2.415470 |
| C                                            | 5.092219  | -2.312079 | -2.796605 |
| H                                            | 5.651698  | -2.503945 | -1.871495 |
| H                                            | 5.817718  | -2.213538 | -3.609081 |
| C                                            | 4.069126  | -3.416795 | -3.027972 |
| H                                            | 4.461871  | -4.423553 | -2.860676 |
| H                                            | 3.696090  | -3.372796 | -4.059290 |
| H                                            | 0.890825  | -2.329365 | -0.687198 |
| <b>5 (equilibrium geometry in gas phase)</b> |           |           |           |
| Ni                                           | 0.000000  | 0.000000  | 0.000000  |
| O                                            | -0.664844 | 2.610219  | -0.638482 |
| N                                            | -0.100407 | -0.858196 | -1.637867 |
| N                                            | -0.500589 | 1.489189  | -1.076627 |
| N                                            | -0.666601 | 1.278951  | -2.353109 |
| N                                            | -0.576193 | -0.440723 | -3.906080 |

|   |           |           |           |
|---|-----------|-----------|-----------|
| C | -0.433681 | -0.054185 | -2.616441 |
| C | -0.322399 | -1.796073 | -4.276519 |
| C | -0.978780 | 0.462560  | -4.974199 |
| C | -1.141002 | -3.958744 | -4.927670 |
| C | -1.386783 | -2.647288 | -4.546735 |
| C | 0.164938  | -4.419263 | -5.032369 |
| C | 0.985921  | -2.252785 | -4.386095 |
| C | 1.227253  | -3.567271 | -4.759855 |
| O | 0.664844  | -2.610219 | 0.638482  |
| N | 0.100407  | 0.858196  | 1.637867  |
| N | 0.500589  | -1.489189 | 1.076627  |
| N | 0.666601  | -1.278951 | 2.353109  |
| N | 0.576193  | 0.440723  | 3.906080  |
| C | 0.433681  | 0.054185  | 2.616441  |
| C | 0.322399  | 1.796073  | 4.276519  |
| C | 0.978780  | -0.462560 | 4.974199  |
| C | 1.141002  | 3.958744  | 4.927670  |
| C | 1.386783  | 2.647288  | 4.546735  |
| C | -0.164938 | 4.419263  | 5.032369  |
| C | -0.985921 | 2.252785  | 4.386095  |
| C | -1.227253 | 3.567271  | 4.759855  |
| H | 0.061255  | -1.841645 | -1.825231 |
| H | -1.919300 | 0.124831  | -5.424740 |
| H | -0.209364 | 0.482496  | -5.754375 |
| H | -1.114612 | 1.464087  | -4.570750 |
| H | -1.973471 | -4.626517 | -5.135445 |
| H | -2.404508 | -2.275096 | -4.446089 |
| H | 0.356102  | -5.448894 | -5.324833 |
| H | 1.805869  | -1.571440 | -4.166786 |



|   |           |           |           |
|---|-----------|-----------|-----------|
| H | 2.250001  | -3.927535 | -4.838347 |
| H | -0.061255 | 1.841645  | 1.825231  |
| H | 1.919300  | -0.124831 | 5.424740  |
| H | 0.209364  | -0.482496 | 5.754375  |
| H | 1.114612  | -1.464087 | 4.570750  |
| H | 1.973471  | 4.626517  | 5.135445  |
| H | 2.404508  | 2.275096  | 4.446089  |
| H | -0.356102 | 5.448894  | 5.324833  |
| H | -1.805869 | 1.571440  | 4.166786  |
| H | -2.250001 | 3.927535  | 4.838347  |
